# **Serum-free culture system for spontaneous human mesenchymal stem cell spheroids formation**

Guoyi Dong<sup>1,2\*</sup>, Shengpeng Wang<sup>1,2\*</sup>, Yuping Ge<sup>1,2</sup>, Weihua Zhao<sup>3</sup>, Qiuting Deng<sup>1,2</sup>, Qi Cao<sup>1</sup>, Quanlei Wang<sup>1,2</sup>, Zhouchun Shang<sup>1,2</sup>, Wenjie OuYang<sup>1,2</sup>, Jing Li<sup>1,2</sup>, Chao Liu<sup>1,2</sup>, Jie Tang<sup>3</sup>, Ying Gu<sup>1,2#</sup>

1. BGI-Shenzhen, Shenzhen 518083, China

2. China National GeneBank, BGI-Shenzhen, Shenzhen 518120, China

3. Shenzhen Second People's Hospital, First Affiliated Hospital of Shenzhen University, Shenzhen 518035, Guangdong Province, China

\*These authors contributed equally to this work.

#To whom correspondence should be addressed: Ying Gu (YingGu@genomics.cn).

## **Abstract**

Human mesenchymal stem cells (hMSCs) are widely used in clinical research because of their multipotential, immunomodulatory, and reparative properties. Previous studies determined that hMSC spheroids from three-dimensional (3D) culture possess higher therapeutic efficacy than conventional hMSCs from monolayer (2D) culture. To date, various 3D culture methods have been developed to form hMSC spheroids, but most of them used culture medium containing fetal bovine serum (FBS), which is not suitable for further clinical use. Here, we demonstrate that dissociated single MSCs seeded in induced pluripotent stems medium (MiPS), adhere loosely to the dish and spontaneously migrate to form spheroids during day 3 to day 6. Through component deletion screening and complementation experiments, the knockout serum replacement (KSR) was identified as necessary and sufficient for hMSC spheroid formation. Transcriptome analysis showed that the overall expression profiles were highly similar between 2D culture with FBS and KSR derived spheroids and that genes related to inflammatory response, immune response, and angiogenesis were up-regulated in spheroids at day 6. qPCR results further validated the increased expression level of related genes, including *STC1*, *CCL7*, *HGF*, *IL24*, and *TGFB3*. When spheroids were re-plated in normal FBS medium, cells formed a typical spindle-shaped morphology, and FACS results showed that the recovered cells retained MSC-specific surface markers, such as CD73, CD90, and CD105. In summary, we developed a practical and convenient method to generate hMSC spheroids for clinical research and therapy.

## **Introduction**

Human mesenchymal stem cells (hMSCs) possess self-renewal and multilineage differentiation potential[1, 2] and are extensively used in clinical studies. hMSCs can be derived from a wide range of tissues, such as bone marrow, adipose tissue, umbilical cord, placenta and dental pulp[3], and can be cultured *in vitro* for several generations. However, clinical data has shown a low survival rate for hMSCs from monolayer two-dimensional (2D) culture when implanted *in vivo*, and optimized approaches for hMSCs production are required for clinical application. Recent studies showed that aggregating hMSCs into 3D spheroids increased cell survival [4] and

stemness [5, 6] and enhanced anti-inflammatory [7] and proangiogenic [8-10] properties. These data imply that 3D spheroids can be an alternative source for hMSCs in clinical applications.

A variety of 3D *in vitro* spheroid cell culture approaches have been developed [11-13], including hanging drop [7, 14-16], application of low-adhesive substrates [17], membrane-based aggregation [5, 18, 19] and forced aggregation [20]. These techniques partially provide for the large-scale methods for generation of spheroids. However, most of these methods use conditioned medium containing fetal bovine serum (FBS), which contains undefined components and is not recommended for clinical applications [21, 22]. So far, there are reports using a serum-free medium to generate characterized hMSC spheroids. The Yloslato group utilized various serum-free and chemically defined xeno-free media, including MSCGM, MesenCult XF, and StemPro XF to generate hMSC spheroids in hanging drops, and found that compact spheroids formed when human serum albumin (HSA) was added into MesenCult XF and StemPro XF medium. Furthermore, they demonstrated that these hMSC spheroids were activated to express higher levels of therapeutic genes, such as *TSG6*, *IL1A*, *IL1B*, and *STC1*, in StemPro XF medium supplemented with HSA [23]. Meanwhile, Zimmermann et al. utilized the forced aggregation method to form hMSC spheroids in agarose microwells and then cultured them in MesenCult XF medium, and they found that hMSC spheroids only grow in size, but did not increase the production of immunomodulatory paracrine factor PGE2 and IL-6 and IDO [20]. These studies suggested that hMSC spheroids derived from serum-free medium culture maintained, if not enhanced, the hMSCs properties. It is critical to define the composition of the culture medium in these two methods, but complicated procedures (hanging drops or forced aggregation) or instrument (agarose microwells) are also required and hinder their potential large-scale applications.

We developed a novel method to generate hMSC spheroids spontaneously in condition medium containing knockout serum replacement (KSR). RNA-Seq and qPCR results showed that MSC spheroids showed up-regulated expression of therapeutic factors, including inflammatory response, immune response, and angiogenesis genes, and spheroid cells retained MSC-specific immunophenotypic markers after re-plating in FBS culture medium. Overall, our approach provides a convenient and straightforward method for generating hMSC spheroids with the potential for future clinical applications.

## Methods and materials

### Cell culture

hMSCs were isolated from umbilical cord tissue and cultured in L-DMEM (Gibco, 11885-084) medium containing 15% FBS (Hyclone, sh30084.03) at 37°C in a humidified atmosphere of 5% CO<sub>2</sub>. The medium was changed every three days. When cells reached about 80% confluence, they are dissociated with 0.05% Trypsin-EDTA (Invitrogen, 25300062) and are passaged at 1:3 ratio. Cells from passage 3 to passage 8 were used in this study.

### Formation of spheroids and spheroid recovered monolayer MSCs

Cells at passage 3, 5 and 8 were dissociated into single cells with 0.05% Trypsin-EDTA (Invitrogen, 25300062), counted by Countstar (BioTech) and seeded at the indicated concentration (from  $1 \times 10^4$  to  $1 \times 10^5$  per cm<sup>2</sup>) in human induced pluripotent stem cells medium (refer to as

MiPS), which is DMEM/F12 (Gibco, 11320-033) containing 20% KSR (Gibco, 10828-028), 2uM L-Glutamine (Sigma G8540), 0.1uM NEAA (Gibco, 11140-050), 0.1uM 2-Mercaptoethanol (Gibco, 21985-023) and 10ng/ml human bFGF (Invitrogen, PHG0021) or in L-DMEM (Gibco, 11885-084) containing 20% KSR (refer to as L-KSR). Other mediums containing 20% KSR used in this study include H-DMEM (LIFE TECHNOLOGIES, 11965-092), DMEM/F12 (LIFE TECHNOLOGIES, 10565-018), MEM (GIBCO, 11095080), RPMI1640 (GIBCO, C22400500BT). L-DMEM containing 15% FBS, was used for regular hMSCs culture and refer to as L-FBS. Cells were incubated at 37°C in a humidified atmosphere of 5% CO<sub>2</sub>. To recover monolayer hMSCs from spheroids, spheroids at day 6 in MiPS or L-KSR were collected and washed with PBS, then cultured in L-FBS.

### **Staining of spheroid cells**

hMSC spheroids at day1, 3 and 6 were stained with Calcein-AM (BIOLEGEND, 425201) and PI (SIGMA, P4170-25MG) according to the manufacturer's protocol. Briefly, Spheroids were incubated in PBS containing Calcein-AM and PI at 37 °C for 1 h, washed twice with PBS, and then resuspended in MiPS/L-KSR medium.

### **Image and Video record**

Cells or spheroids were photographed with a microscope (Zeiss LSM 510) at indicated time points and videos were obtained with a high contrast instrument (Biotek, Cytation 5) for 72 hours.

### **Flow cytometry sorting**

Monolayer MSCs recovered from spheroids at day 6 were harvested by trypsinization and pipetting. To determine cell surface antigen expression, the samples were incubated with the following antibodies: human monoclonal antibodies against CD73 (BIOLEGEND, 344004), CD90 (BIOLEGEND, 328110) and CD105 (BIOLEGEND, 323205). The samples were analyzed using a flow cytometer (BD Biosciences) and gated according to forward scatter and side scatter.

### **qPCR**

Cells were collected and lysed by Trizol and total RNA was extracted according to the manufacturer's instructions (Invitrogen, 10296-028). RNA was quantified with Nanodrop spectrophotometer (Thermo Scientific). 3μg of total RNA was used for reverse transcription with the Prime Script First Strand cDNA Synthesis Kit (Takara, D6110A). Quantitative real-time PCR (qPCR) was performed using SYBR (Takara, RR420A). Thermal cycling was performed with 7500 System (Applied Biosystems) by incubating the reactions at 95°C for 20 s followed by 40 cycles of 95°C for 1 s and 60°C for 20 s. Primers for qPCR analyses are shown as follows, *STC1* Forward- CACGAGCTGACTTCAACAGGA, Reverse- GGATGTGCGTTTGATGTGGG; *CCL7* Forward- CAGCCAGATGCAATCAATGCC, Reverse- TGGAATCCTGAACCCACTTCT; *HGF*-GCTATCGGGGTAAAGACCTACA, Reverse- CGTAGCGTACCTCTGGATTGC; *IL24* Forward-TTGCCTGGGTTTTACCCTGC, Reverse- AAGGCTTCCCACAGTTTCTGG; *TGFB3* Forward- ACTTGCACCACCTTGGACTTC, Reverse- GGTCATCACCGTTGGCTCA.

### **Data analysis**

hMSCs spheroid size was measured with the Image J software. The mean and standard derivation were calculated with excel software.

### **Initial processing and alignment of RNA-seq data**

The FASTQ data of each sample were aligned to the rRNA database (downloaded from NCBI) by SOAPaligner (version 2.21t) to remove rRNAs, and the remaining reads were processed with SOAPnuke (version 1.5.3)[24] to trim adaptors and filter out the low-quality reads. The filtered data were aligned to the hg19 RefSeq transcriptome downloaded from the UCSC Genome Browser database[25] using bowtie2 (version 2.2.5)[26]. Quantification of gene expression levels in raw counts and TPM for all genes in all samples was performed using RSEM v1.2.4[27].

### **Identification of differentially expressed genes**

Differential expression of genes in each group was determined using the R package Deseq2[28] with default parameters, in which an adjusted p-value of 0.05 and  $\log_2$  (fold-change) > 1 was used to identify significantly differentially expressed genes.

### **GO term and KEGG enrichment analysis**

Gene ontology and KEGG pathway enrichment were analyzed using DAVID [29] and the BH method was used for multiple test correction. GO terms with an FDR less than 0.05 were considered as significantly enriched.

### **Ethical statement**

Written informed consent was obtained from donors for all human samples and all experiments were approved by the BGI ethics committee.

## **Results**

### **Human mesenchymal stem cells spontaneously generate spheroids in serum-free medium containing KSR.**

As a substitution of serum, KSR was first used to maintain mouse embryonic stem cells (mESCs). Recently, researchers observed that KSR can maintain the proliferation and differentiation of monolayer cultures of adipose-derived MSCs by pre-seeding cells in FBS containing medium for 6 hours and transferring to KSR containing medium [30, 31], and in 3D rat testicular culture[32]. These studies indicated that KSR seems to be a suitable substitution of FBS for 2D and 3D cell culture. To test whether hMSCs could be maintained in KSR contained medium, we designed the experiments (Figure 1A). We digested hMSCs at passage 3 and re-seeded the single cells in MiPS, which was originally designed for maintenance and expansion of human embryonic stem cells (hESCs) [33, 34].

Interestingly, dissociated single cells maintained a round cell morphology, attached lightly to the tissue culture dish surface (Figure 1B) and generated spheroids at day 3. To determine the key ingredient(s) in MiPS that promote spheroids formation, we conducted a screening that each time one component was removed from MiPS to establish several incomplete MiPS groups. We found that most of the cells in these incomplete MiPS groups could spontaneously form spheroids, except for cells without KSR (Figure 1B), as they attached to the culture dish, maintained fibroblast-like morphology, and mimicked the cells in L-FBS medium (Figure 1B). To test whether

KSR alone was sufficient to generate the hMSC spheroids, we supplemented the basal medium L-DMEM with KSR and used it to culture dissociated hMSCs. We analyzed a KSR concentration gradient and found that KSR can produce spheroids at the concentration as low as 2%, though higher concentration tended to promote a better spheroid formation (Fig S1A-B). Moreover, the addition of KSR into other several basal mediums, including RPMI1640, DMEM/F12, H-DMEM, MEM, also can promote the generation of MSC spheroids (Figure S1C). We also tested the effect of initial cell concentration on spheroids formation and found MSCs could generate spheroids at a concentration as low as  $1 \times 10^4$ /ml in 20% KSR (Fig S2). These results indicated that KSR was the critical component to promote the generation of MSC spheroids. To simplify, we used 20% KSR in L-DMEM medium in the subsequent experiments and refer to as L-KSR.

The capacity of L-KSR medium to promote spheroid formation was comparable to that of MiPS medium (Figure 1C and 1D). In both medium, after seeding, the nearby cells spontaneously migrated and aggregated into small and loose spheroids from day 1 to day 3, and several small spheroids coalesced into large and compact spheroids from day 3 to day 6 (Figure 1C and 1D, supplementary video 1, 2). The mean diameter of hMSC spheroids increased with the prolongation of culture time. Cell viability identified by Calcein-AM/PI showed that the percentage of dead cells increased in spheroids in MiPS and L-KSR with cultured time, but still maintained at a high level (>80%) at day 6 (Figure 1C and 1D). This observation is similar to a previous report using a hanging drop protocol to aggregate hMSCs into spheroids [7]. Thus, our data showed that MSCs can spontaneously form spheroids in MiPS medium, and the medium component KSR is necessary and sufficient to generate spheroids.

#### **MSCs at high passage retain the ability to form spheroids in KSR medium.**

Recent studies have shown that MSCs gradually lose their therapeutic potency due to an increasing senescent cell subset during long-term culture *in vitro* [35-38]. To test whether hMSCs at high passage could also form spheroids in KSR medium, hMSCs at passage 5 and passage 8 were cultured in MiPS and L-KSR medium. Our results showed that cells at P5 and P8 both could form spheroids in MiPS/L-KSR medium (Figure 2A and B), although statistical analysis showed that spheroid mean diameter from P8 hMSCs slightly decreased when compared to that of P5 (Figure 2 A and B). Overall, it demonstrated that MSCs at high passage still can generate spheroids in KSR medium.

#### **Transcriptomics analysis reveals that MSC spheroids generated in KSR medium obtain enhanced expression of therapeutic genes**

Previous studies demonstrated the expression of anti-inflammatory factors, angiogenic growth factors and cytokines, such as *TNF $\alpha$*  stimulated gene/protein 6 (*TSG-6*), stanniocalcin-1 (*STC-1*), angiogenin (*ANG*), fibroblast growth factor2 (*FGF-2*), angiopoietin 2 (*ANGPT-2*), and hepatocyte growth factor (*HGF*), are significantly increased in MSC spheroid cultures, suggesting MSCs cultured in spheroids can enhance cell therapeutic potentials, including anti-inflammation [7] and proangiogenesis [8-10]. To investigate whether the hMSC spheroids generated with our method has the similar effect, we plated P5 and P8 MSCs in L-FBS, MiPS, and L-KSR medium respectively and collected the cells or hMSC spheroids after 6 days' culture in those different mediums for RNA-seq analysis.

We analyzed the overall transcript expression level in these three groups. The transcriptomic correlation analysis showed that all the samples were highly related (Figure 3A and B), and heat map results showed that the expression of several important MSC marker genes was similar (Figure 3C). It demonstrated that these spheroid samples maintained MSC features. To validate whether therapeutic potential genes were altered in 3D spheroids, we compared 3D spheroids in MiPS/L-KSR with 2D adherent monolayer MSCs in L-FBS. Heat map results showed that potential therapeutic genes, including *STC1*, *CCL7*, *TNFRSF1B*, *LIF*, *TGFB*, *IL1B*, *IL1A*, *HGF* were up-regulated and *DKK1*, *VIM* genes were down-regulated (Figure 4A). Go Term analysis showed that these changed genes are associated with extracellular matrix organization, cell adhesion, wounding healing, angiogenesis, inflammatory response, signal transduction, and immune response (Figure 4B). KEGG analysis showed that these genes are associated with protein digestion and absorption, ECM-cytokine receptor interaction, focal adhesion, and P13K-Akt signaling pathway (Figure 4C). Our qPCR assay confirmed the up-regulated expression of *STC1*, *CCL7*, *HGF*, *IL24*, and *TGFB3* (Figure. 4D), which are considered as critical genes required for MSCs' function. In summary, RNA-seq and qPCR result suggested the expression of potential therapeutic genes in spheroids can be enhanced in MiPS/L-KSR.

### **Spheroid-recovered MSC cells retain mesenchymal stem cell features**

Previous studies showed that the cells in spheroids retained most of the surface epitopes of hMSCs from adherent cultures. To ensure that the MSCs are useful for research and clinical applications, it is critical to assure that growth as spheroids in KSR does not compromise MSC properties. To this end, we transferred spheroids derived from P8 MSC at day 6 from MiPS and L-KSR back to standard L-FBS culture medium. Results showed that MSC spheroid began to attach on culture dish surface, and then cells in spheroids migrated out and adhered to culture dish to proliferate from day1 to day 6 (Figure 5 A). Spheroid-recovered MSC cells were collected for FACS analysis. FACS results showed that the expression of MSC markers, including CD73, CD90, and CD105 in MiPS/L-KSR samples were still highly positive compared with that in normal cultured 2D MSCs (Fig. 5B).

### **Discussion**

Cells cultured in 3D as spheroids *in vitro* provide enhanced cell-cell interactions and more closely mimic the natural microenvironment of a tissue. Therefore, it has been widely used in various fields, including tumor biology[39, 40], drug discovery, toxicology screening [41, 42] and organoid research[32, 43]. Previous studies showed that MSCs can form spheroids with a variety of methods. However, most of those methods have to use medium containing FBS or need special instruments (hanging drop) or complicated procedure (gel coating) [12], hindering their large-scale implication in clinical trials. Here, we developed a convenient method to generate MSC spheroids spontaneously in a novel serum-free formula without any special instrumentation or pre-coated gels.

First of all, we found that MiPS could prevent cells from adhering to the tissue culture dish, and facilitate cells to migrate and aggregate into spheroids (Fig. 1B). Then, we demonstrated that KSR in MiPS was the only critical active ingredients to promote spheroid formation. In fact, KSR is not



only necessary, but also sufficient to promote hMSC spheroid formation when added into different basal medium (Fig.1 B-D and Fig. S1). KSR is a substitution of FBS and all the components are well defined, consisting of albumin, transferrin, insulin, collagen precursors, amino acids, vitamins, antioxidants, and trace elements [26]. Therefore, KSR is more suitable for clinical-grade MSC production as it eliminates many of the uncertainties encountered when using poorly defined serum supplements. Our study demonstrated that KSR at a concentration as low as 2% could promote hMSC spheroids formation, though a higher concentration tends to generate larger spheroids in a relatively shorter time (Fig. S1). It would be interesting to further define the key components in KSR that are pivotal to the spheroid's formation.

Previous studies showed that short-term culture of MSCs in a 3D environment had no significant effect on the level of MSC-specific immunophenotypic marker expression [11]. In this study, we compared the expression pattern of hMSC spheroids derived from MiPS and L-KSR with normal cultured hMSCs through RNA-seq. The overall gene expression pattern, including the MSC marker genes and pluripotency-associated genes, is similar between hMSC spheroids and hMSCs (Fig. 3), suggesting our method didn't change the basic properties of hMSCs. Various studies have demonstrated MSC cells in spheroid generated in medium containing FBS have a higher expression level of immunomodulatory related factors [7, 44]. However, these mediators were not up-regulated in spheroids cultured in the chemically defined xeno-free medium [20]. Interestingly, we found hMSC spheroids generated in KSR medium up-regulated the expression of potentially therapeutic genes (Fig. 4A and D). Go Term and KEGG analysis of these differentially expressed gene indicated that the signaling pathways enriched in KSR derived hMSC spheroids were associated with extracellular matrix organization, cell adhesion, wounding healing, angiogenesis, inflammatory response, signal transduction, and immune response, which were considered to be related to the therapeutic function of MSCs (Fig. 4B and C). More importantly, when our hMSC spheroids were re-plated a tissue culture dish in FBS contained medium, spindle shaped cells migrated out and retained MSC properties (Fig. 5). These results suggest that the hMSC spheroids may be implanted directly into the body and served as an MSC reservoir to play a sustained therapeutic role, though the real biological functions of the hMSC spheroids generated with our method need further *in vivo* validation studies.

In conclusion, we developed a practical and convenient method to generate hMSC spheroids in a defined serum-free medium and preliminary studies suggest it enhanced the therapeutic effect of hMSCs. We anticipate the hMSC spheroids generated with our method could be widely used for future clinical research and therapy.

### Authors'contributions

G.D. designed the experiments. G.D., Y.G., Q.C.,and Q.D. performed the experiments. S.W. pre-processed the sequencing data. S.W. and G.D.analyzed the data. W.Z. and J.T. collected the umbilical cord. Q.W., Z.S., W.O., J.L. and Y.G. jointly the discussions. G.D. and S.W. wrote the manuscript. Y.G. and C.L. revised the manuscript. All authors reviewed and approved the final manuscript.

## Funding

This research was supported by the P.R.China, MST Special Fund. (Project Name: Single cell sequencing based antibody discovery), the Science, Technology and Innovation Commission of Shenzhen Municipality under grant No. JCYJ20170817145845968 and No. CXZZ20130321140247079.

## Acknowledgments

We thank Micheal Dean for help editing the language and BGI colleagues who helped to produce the high-quality data.

## Availability of supporting data

The data that support the findings of this study have been deposited in the CNSA (<https://db.cngb.org/cnsa/>) of CNGBdb with accession code CNP0000456.

## References

1. Dominici, M., et al., *Minimal criteria for defining multipotent mesenchymal stromal cells. The International Society for Cellular Therapy position statement*. Cytotherapy, 2006. 8(4): p. 315-7.
2. Pittenger, M.F., et al., *Multilineage potential of adult human mesenchymal stem cells*. Science, 1999. 284(5411): p. 143-7.
3. Marquez-Curtis, L.A., et al., *Mesenchymal stromal cells derived from various tissues: Biological, clinical and cryopreservation aspects*. Cryobiology, 2015. 71(2): p. 181-97.
4. Jiang, B., et al., *Spheroidal formation preserves human stem cells for prolonged time under ambient conditions for facile storage and transportation*. Biomaterials, 2017. 133: p. 275-286.
5. Cheng, N.C., S. Wang, and T.H. Young, *The influence of spheroid formation of human adipose-derived stem cells on chitosan films on stemness and differentiation capabilities*. Biomaterials, 2012. 33(6): p. 1748-58.
6. Guo, L., et al., *Epigenetic changes of mesenchymal stem cells in three-dimensional (3D) spheroids*. J Cell Mol Med, 2014. 18(10): p. 2009-19.
7. Bartosh, T.J., et al., *Aggregation of human mesenchymal stromal cells (MSCs) into 3D spheroids enhances their antiinflammatory properties*. Proc Natl Acad Sci U S A, 2010. 107(31): p. 13724-9.
8. Bhang, S.H., et al., *Transplantation of cord blood mesenchymal stem cells as spheroids enhances vascularization*. Tissue Eng Part A, 2012. 18(19-20): p. 2138-47.
9. Potapova, I.A., et al., *Culturing of human mesenchymal stem cells as three-dimensional aggregates induces functional expression of CXCR4 that regulates adhesion to endothelial cells*. J Biol Chem, 2008. 283(19): p. 13100-7.
10. Potapova, I.A., et al., *Mesenchymal stem cells support migration, extracellular matrix invasion, proliferation, and survival of endothelial cells in vitro*. Stem Cells, 2007. 25(7): p. 1761-8.



11. Petrenko, Y., E. Sykova, and S. Kubinova, *The therapeutic potential of three-dimensional multipotent mesenchymal stromal cell spheroids*. Stem Cell Res Ther, 2017. 8(1): p. 94.
12. Cesarz, Z. and K. Tamama, *Spheroid Culture of Mesenchymal Stem Cells*. Stem Cells Int, 2016. 2016: p. 9176357.
13. Fennema, E., et al., *Spheroid culture as a tool for creating 3D complex tissues*. Trends Biotechnol, 2013. 31(2): p. 108-15.
14. Suzuki, S., et al., *Properties and usefulness of aggregates of synovial mesenchymal stem cells as a source for cartilage regeneration*. Arthritis Res Ther, 2012. 14(3): p. R136.
15. Bartosh, T.J. and J.H. Ylostalo, *Preparation of anti-inflammatory mesenchymal stem/precursor cells (MSCs) through sphere formation using hanging-drop culture technique*. Curr Protoc Stem Cell Biol, 2014. 28: p. Unit 2B 6.
16. Foty, R., *A simple hanging drop cell culture protocol for generation of 3D spheroids*. J Vis Exp, 2011(51).
17. Lee, J.H., Y.S. Han, and S.H. Lee, *Long-Duration Three-Dimensional Spheroid Culture Promotes Angiogenic Activities of Adipose-Derived Mesenchymal Stem Cells*. Biomol Ther (Seoul), 2016. 24(3): p. 260-7.
18. Yeh, H.Y., et al., *Substrate-dependent gene regulation of self-assembled human MSC spheroids on chitosan membranes*. BMC Genomics, 2014. 15: p. 10.
19. Tseng, T.C., et al., *Biomaterial Substrate-Mediated Multicellular Spheroid Formation and Their Applications in Tissue Engineering*. Biotechnol J, 2017. 12(12).
20. Zimmermann, J.A. and T.C. McDevitt, *Pre-conditioning mesenchymal stromal cell spheroids for immunomodulatory paracrine factor secretion*. Cytotherapy, 2014. 16(3): p. 331-45.
21. Sharma, R.R., et al., *Mesenchymal stem or stromal cells: a review of clinical applications and manufacturing practices*. Transfusion, 2014. 54(5): p. 1418-37.
22. Spees, J.L., et al., *Internalized antigens must be removed to prepare hypoinmunogenic mesenchymal stem cells for cell and gene therapy*. Mol Ther, 2004. 9(5): p. 747-56.
23. Ylostalo, J.H., et al., *Unique characteristics of human mesenchymal stromal/progenitor cells pre-activated in 3-dimensional cultures under different conditions*. Cytotherapy, 2014. 16(11): p. 1486-1500.
24. Chen, Y., et al., *SOAPnuke: a MapReduce acceleration-supported software for integrated quality control and preprocessing of high-throughput sequencing data*. Gigascience, 2018. 7(1): p. 1-6.
25. Fujita, P.A., et al., *The UCSC Genome Browser database: update 2011*. Nucleic Acids Res, 2011. 39(Database issue): p. D876-82.
26. Langmead, B. and S.L. Salzberg, *Fast gapped-read alignment with Bowtie 2*. Nat Methods, 2012. 9(4): p. 357-9.
27. Dalerba, P., et al., *Single-cell dissection of transcriptional heterogeneity in human colon tumors*. Nat Biotechnol, 2011. 29(12): p. 1120-7.
28. Love, M.I., W. Huber, and S. Anders, *Moderated estimation of fold change and dispersion for RNA-seq data with DESeq2*. Genome Biol, 2014. 15(12): p. 550.
29. Huang da, W., B.T. Sherman, and R.A. Lempicki, *Bioinformatics enrichment tools: paths toward the comprehensive functional analysis of large gene lists*. Nucleic Acids Res, 2009. 37(1): p. 1-13.
30. Lund, P., et al., *Effect of growth media and serum replacements on the proliferation and*

- differentiation of adipose-derived stem cells*. Cytotherapy, 2009. 11(2): p. 189-97.
31. Ho, S.T., et al., *Upregulation of Adipogenesis and Chondrogenesis in MSC Serum-Free Culture*. Cell Med, 2011. 2(1): p. 27-41.
32. Zhang, X., et al., *The use of KnockOut serum replacement (KSR) in three dimensional rat testicular cells co-culture model: An improved male reproductive toxicity testing system*. Food Chem Toxicol, 2017. 106(Pt A): p. 487-495.
33. Amit, M., et al., *Clonally derived human embryonic stem cell lines maintain pluripotency and proliferative potential for prolonged periods of culture*. Dev Biol, 2000. 227(2): p. 271-8.
34. Dakhore, S., B. Nayer, and K. Hasegawa, *Human Pluripotent Stem Cell Culture: Current Status, Challenges, and Advancement*. Stem Cells Int, 2018. 2018: p. 7396905.
35. Fu, W.L., et al., *Mesenchymal Stem Cells Derived from Peripheral Blood Retain Their Pluripotency, but Undergo Senescence During Long-Term Culture*. Tissue Eng Part C Methods, 2015. 21(10): p. 1088-97.
36. Wagner, W., et al., *Aging and replicative senescence have related effects on human stem and progenitor cells*. PLoS One, 2009. 4(6): p. e5846.
37. Wagner, W., et al., *Replicative senescence of mesenchymal stem cells: a continuous and organized process*. PLoS One, 2008. 3(5): p. e2213.
38. Oja, S., et al., *Automated image analysis detects aging in clinical-grade mesenchymal stromal cell cultures*. Stem Cell Res Ther, 2018. 9(1): p. 6.
39. Weiswald, L.B., D. Bellet, and V. Dangles-Marie, *Spherical cancer models in tumor biology*. Neoplasia, 2015. 17(1): p. 1-15.
40. Katt, M.E., et al., *In Vitro Tumor Models: Advantages, Disadvantages, Variables, and Selecting the Right Platform*. Front Bioeng Biotechnol, 2016. 4: p. 12.
41. Pampaloni, F. and E. Stelzer, *Three-dimensional cell cultures in toxicology*. Biotechnol Genet Eng Rev, 2010. 26: p. 117-38.
42. Thoma, C.R., et al., *3D cell culture systems modeling tumor growth determinants in cancer target discovery*. Adv Drug Deliv Rev, 2014. 69-70: p. 29-41.
43. Clevers, H., *Modeling Development and Disease with Organoids*. Cell, 2016. 165(7): p. 1586-1597.
44. Bartosh, T.J., et al., *Dynamic compaction of human mesenchymal stem/precursor cells into spheres self-activates caspase-dependent IL1 signaling to enhance secretion of modulators of inflammation and immunity (PGE2, TSG6, and STC1)*. Stem Cells, 2013. 31(11): p. 2443-56.



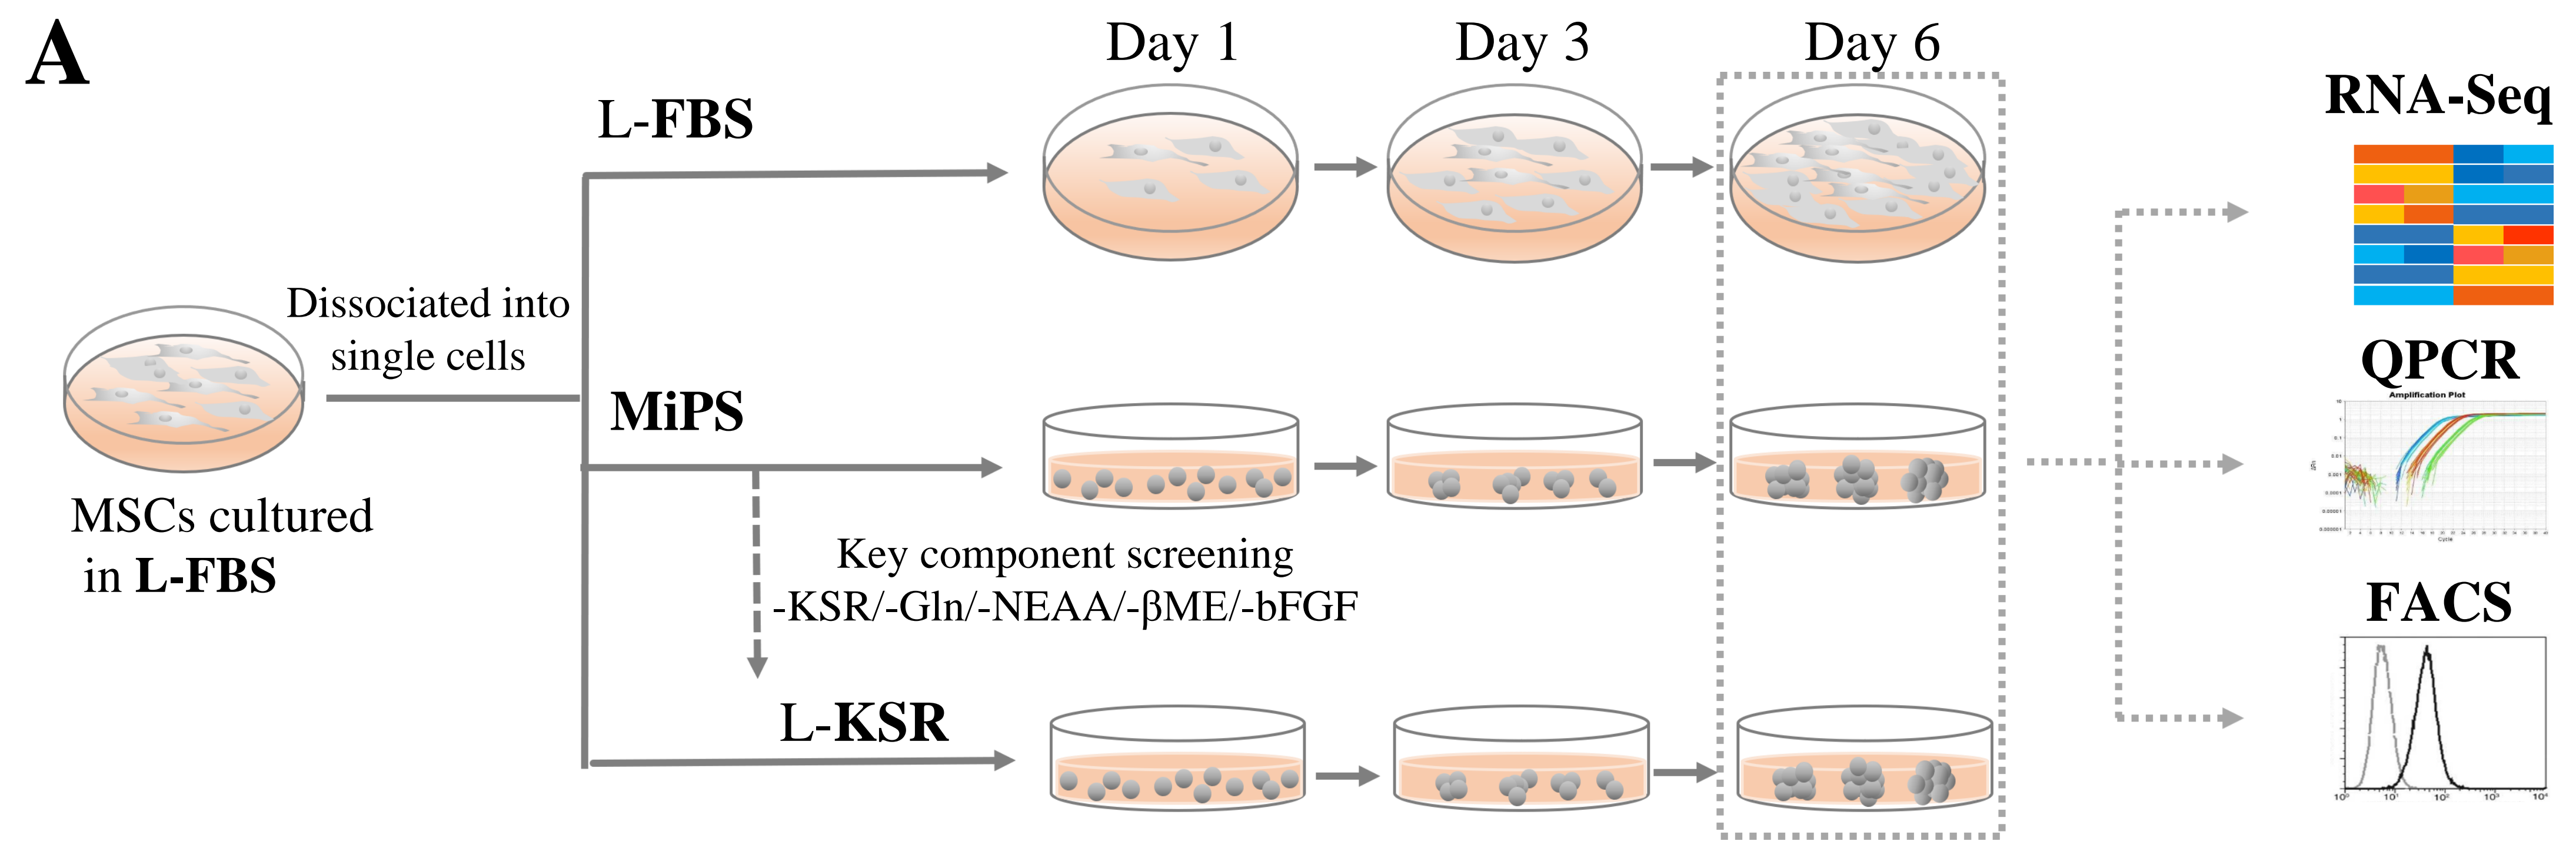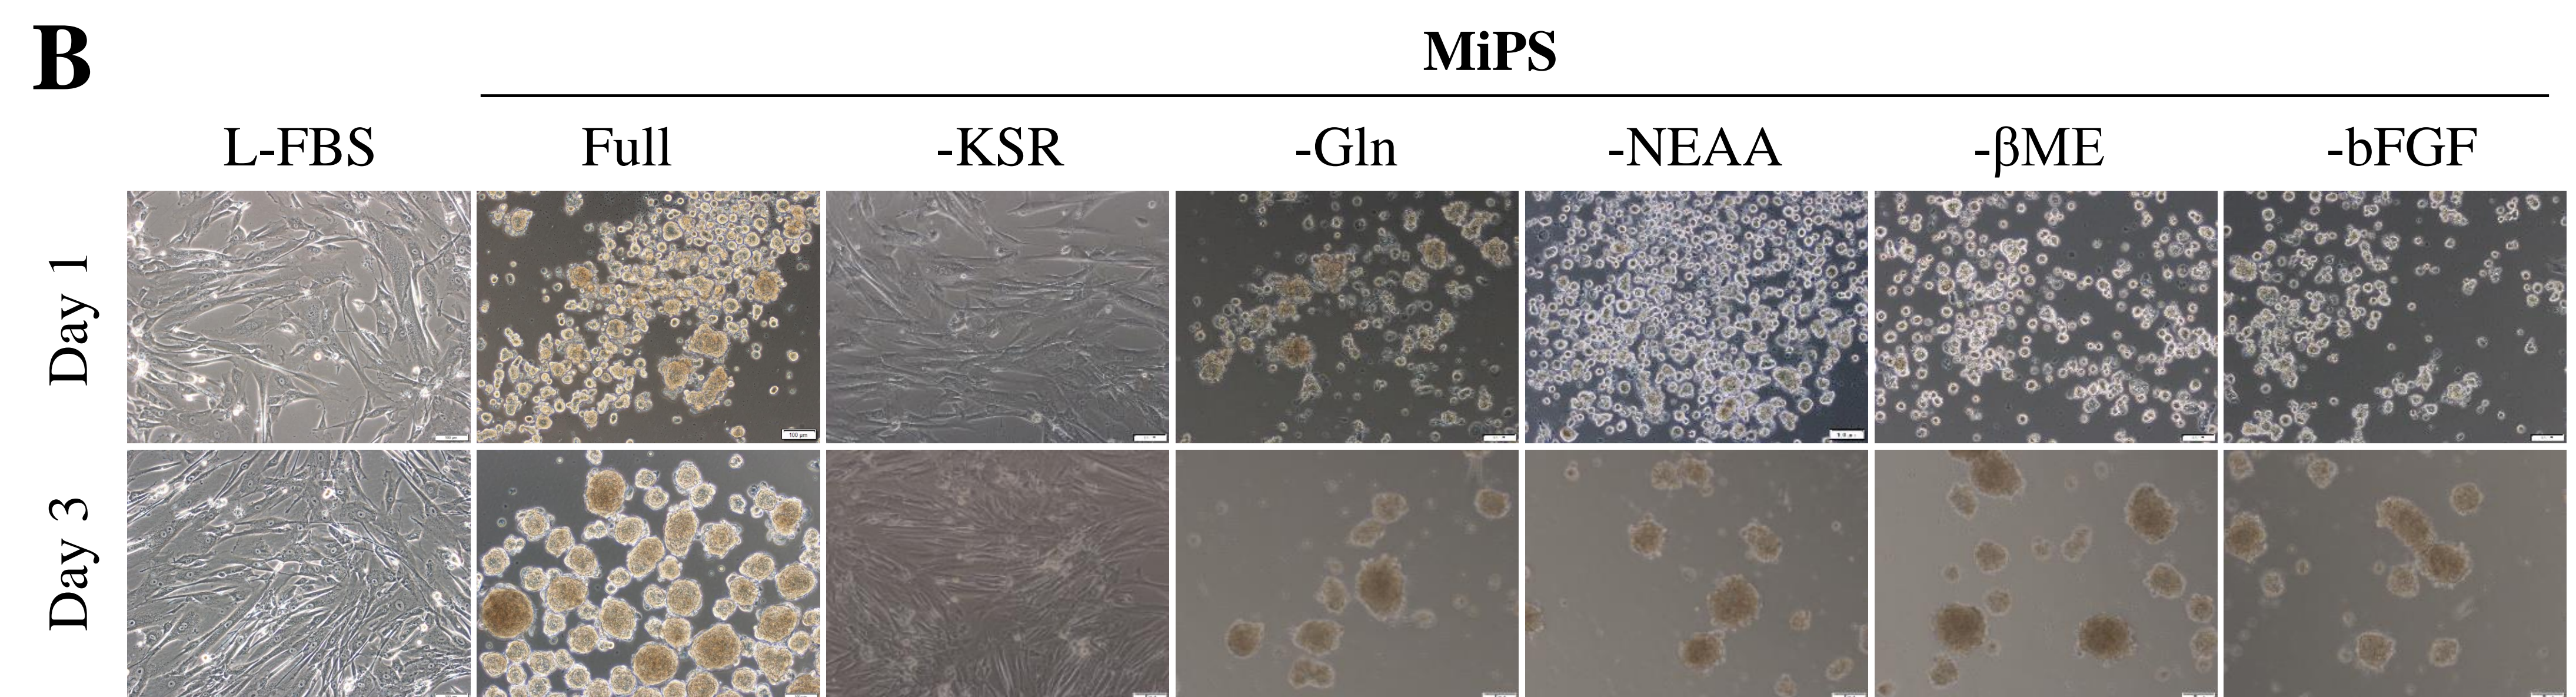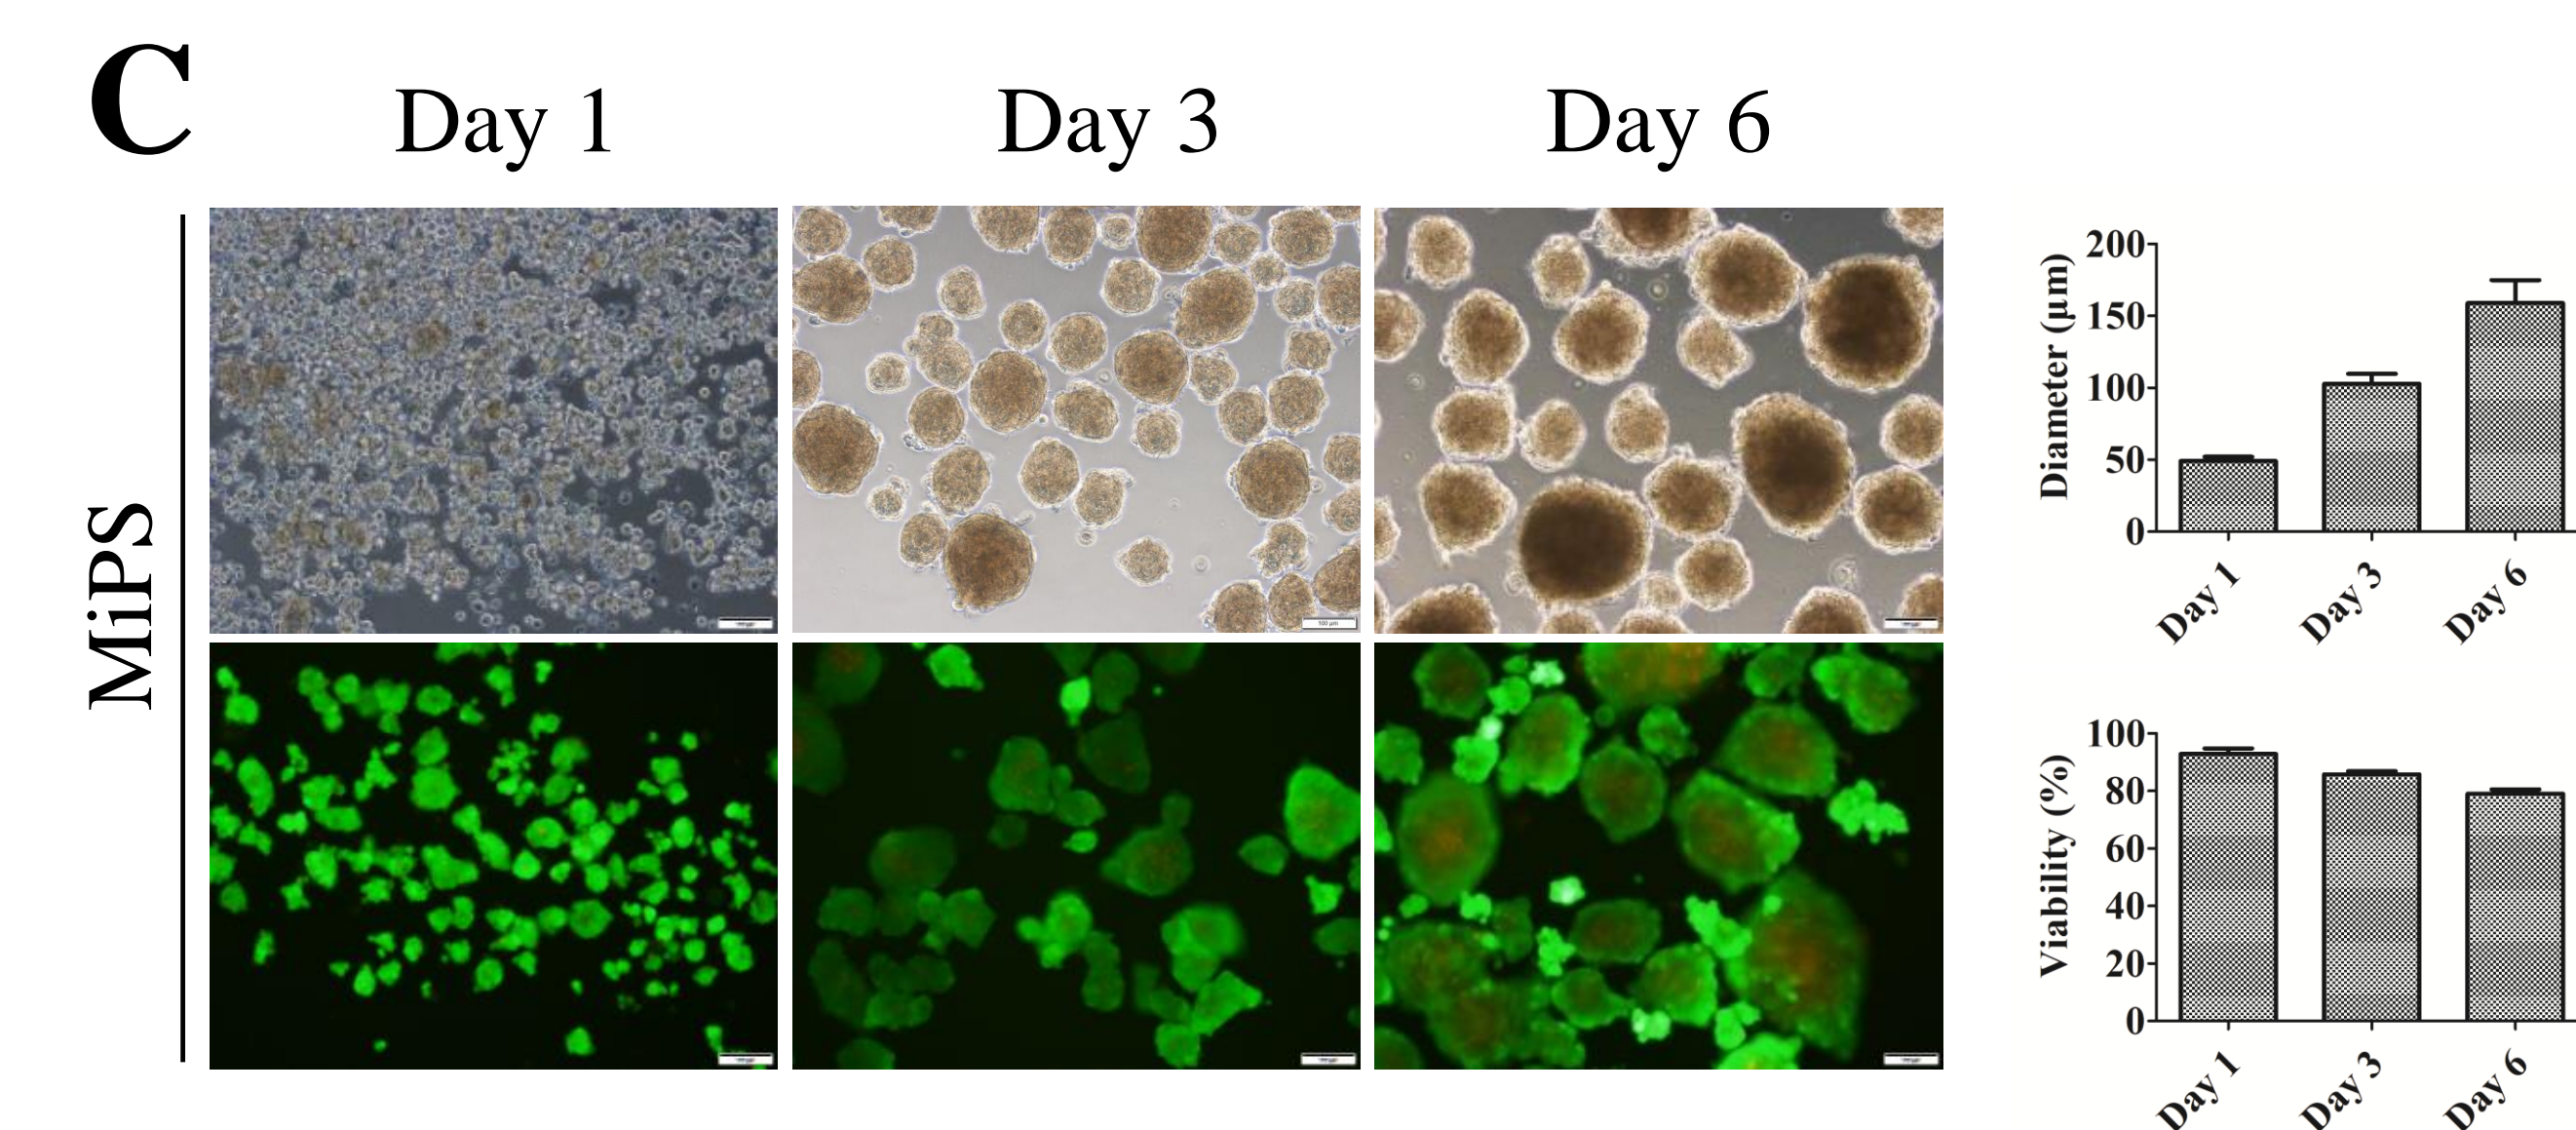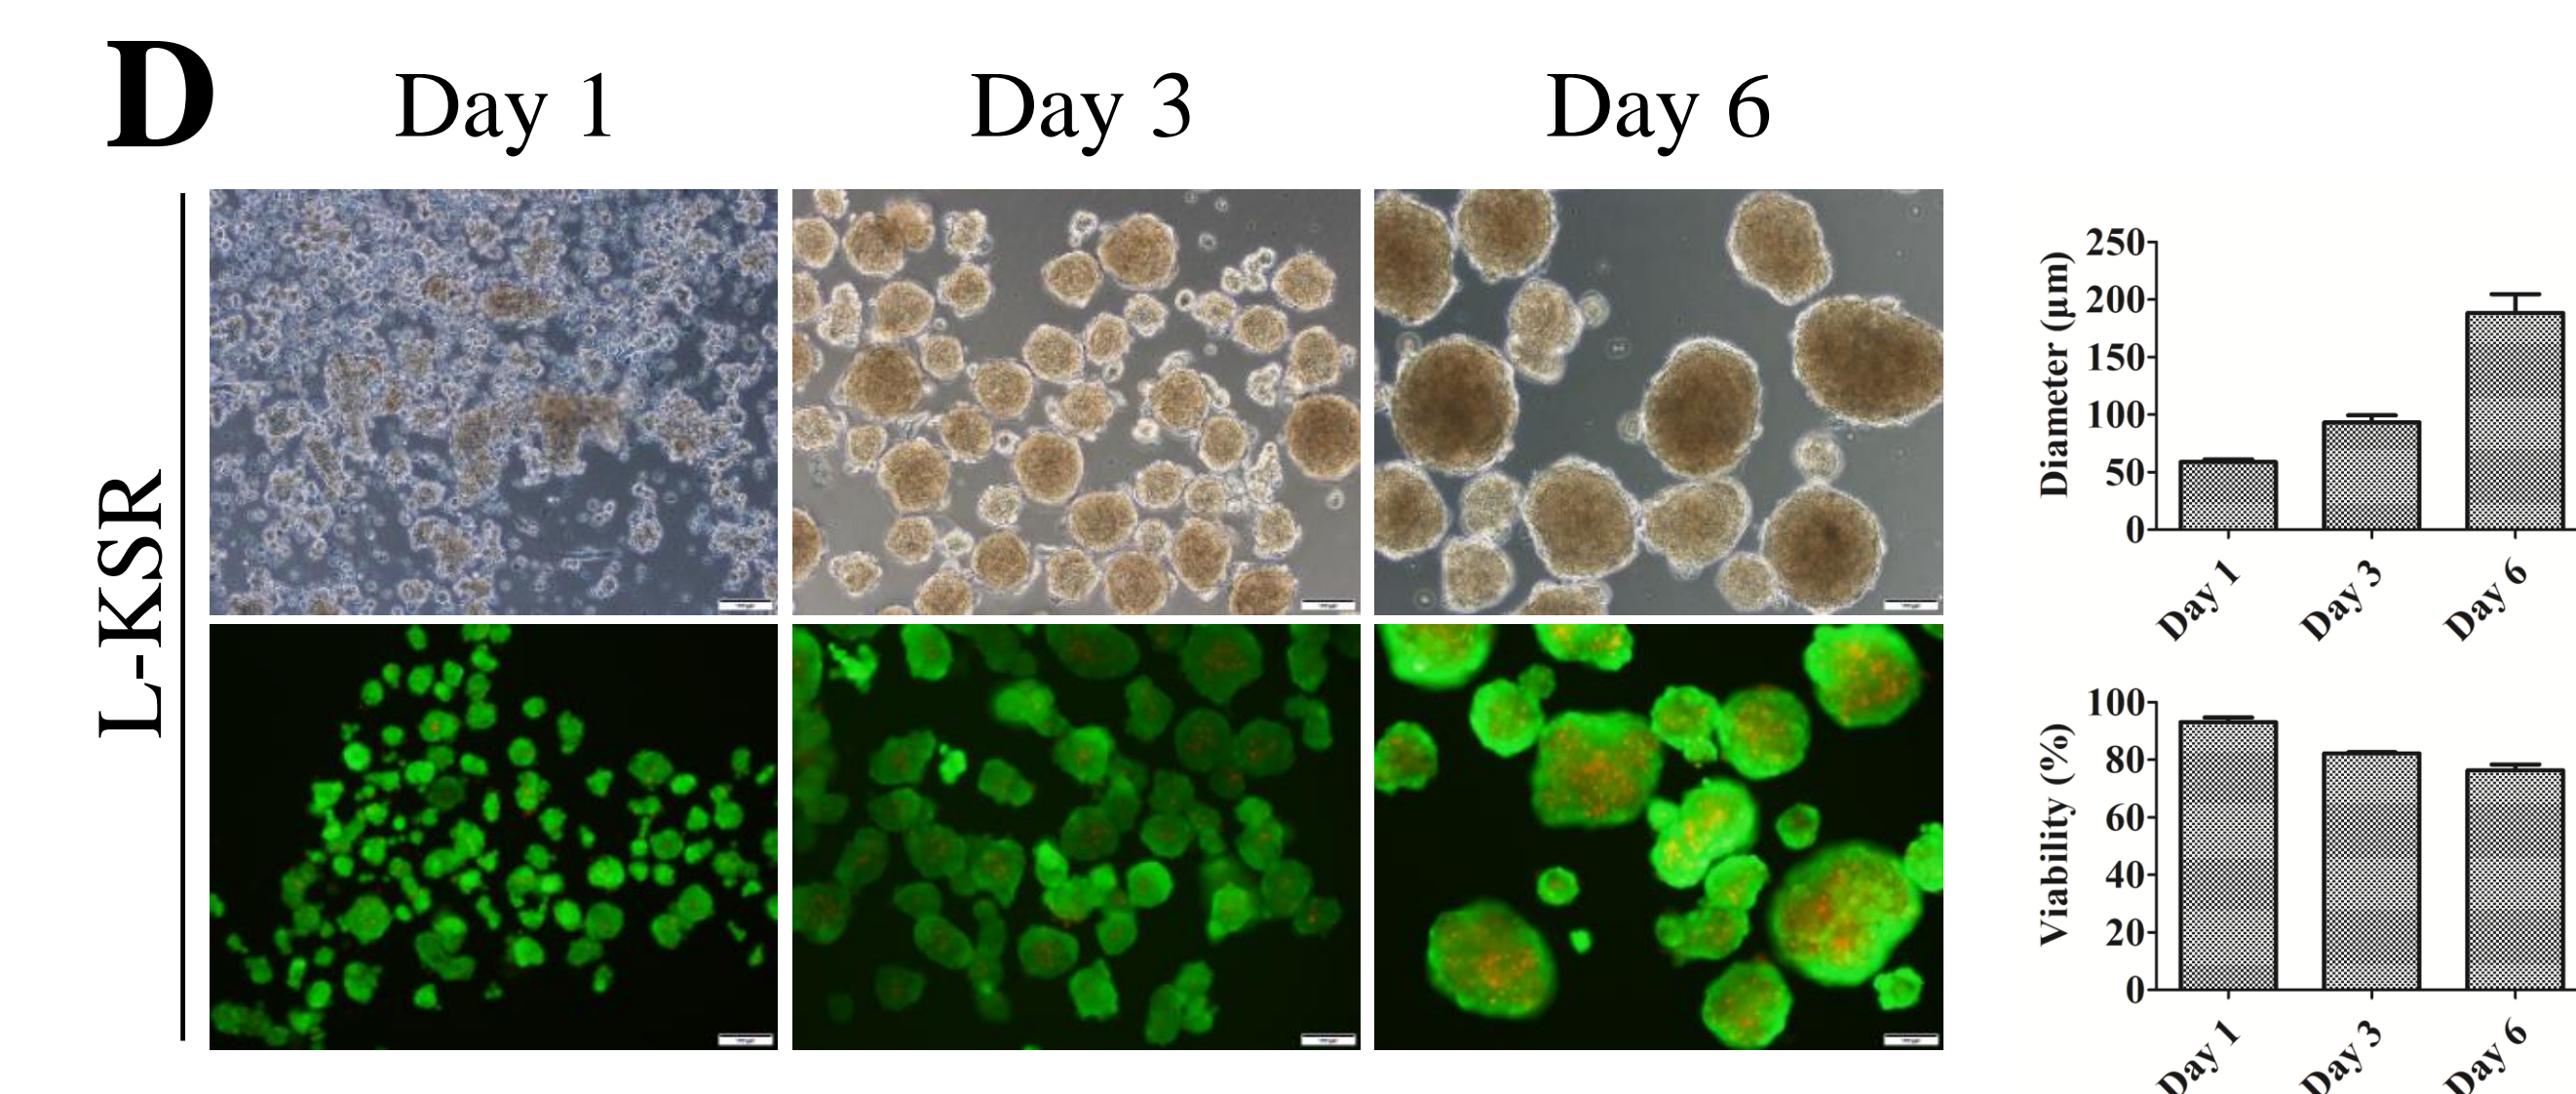

**Figure 1 MSCs at P3 can spontaneously form spheroids in medium containing KSR.**

(A) Schematic diagram shows the experimental procedure; (B) hMSCs cultured in MiPS and MiPS without KSR/GLn/NEAA/βME/bFGF; (C-D) hMSC spheroids was generated and stained with Calcein-AM /PI in MiPS/KSR at day 1, 3 and 6 on tissue culture dishes. Statistical analysis of mean diameter and cell viabilities of hMSC spheroids. Scale bars:100mm



**A**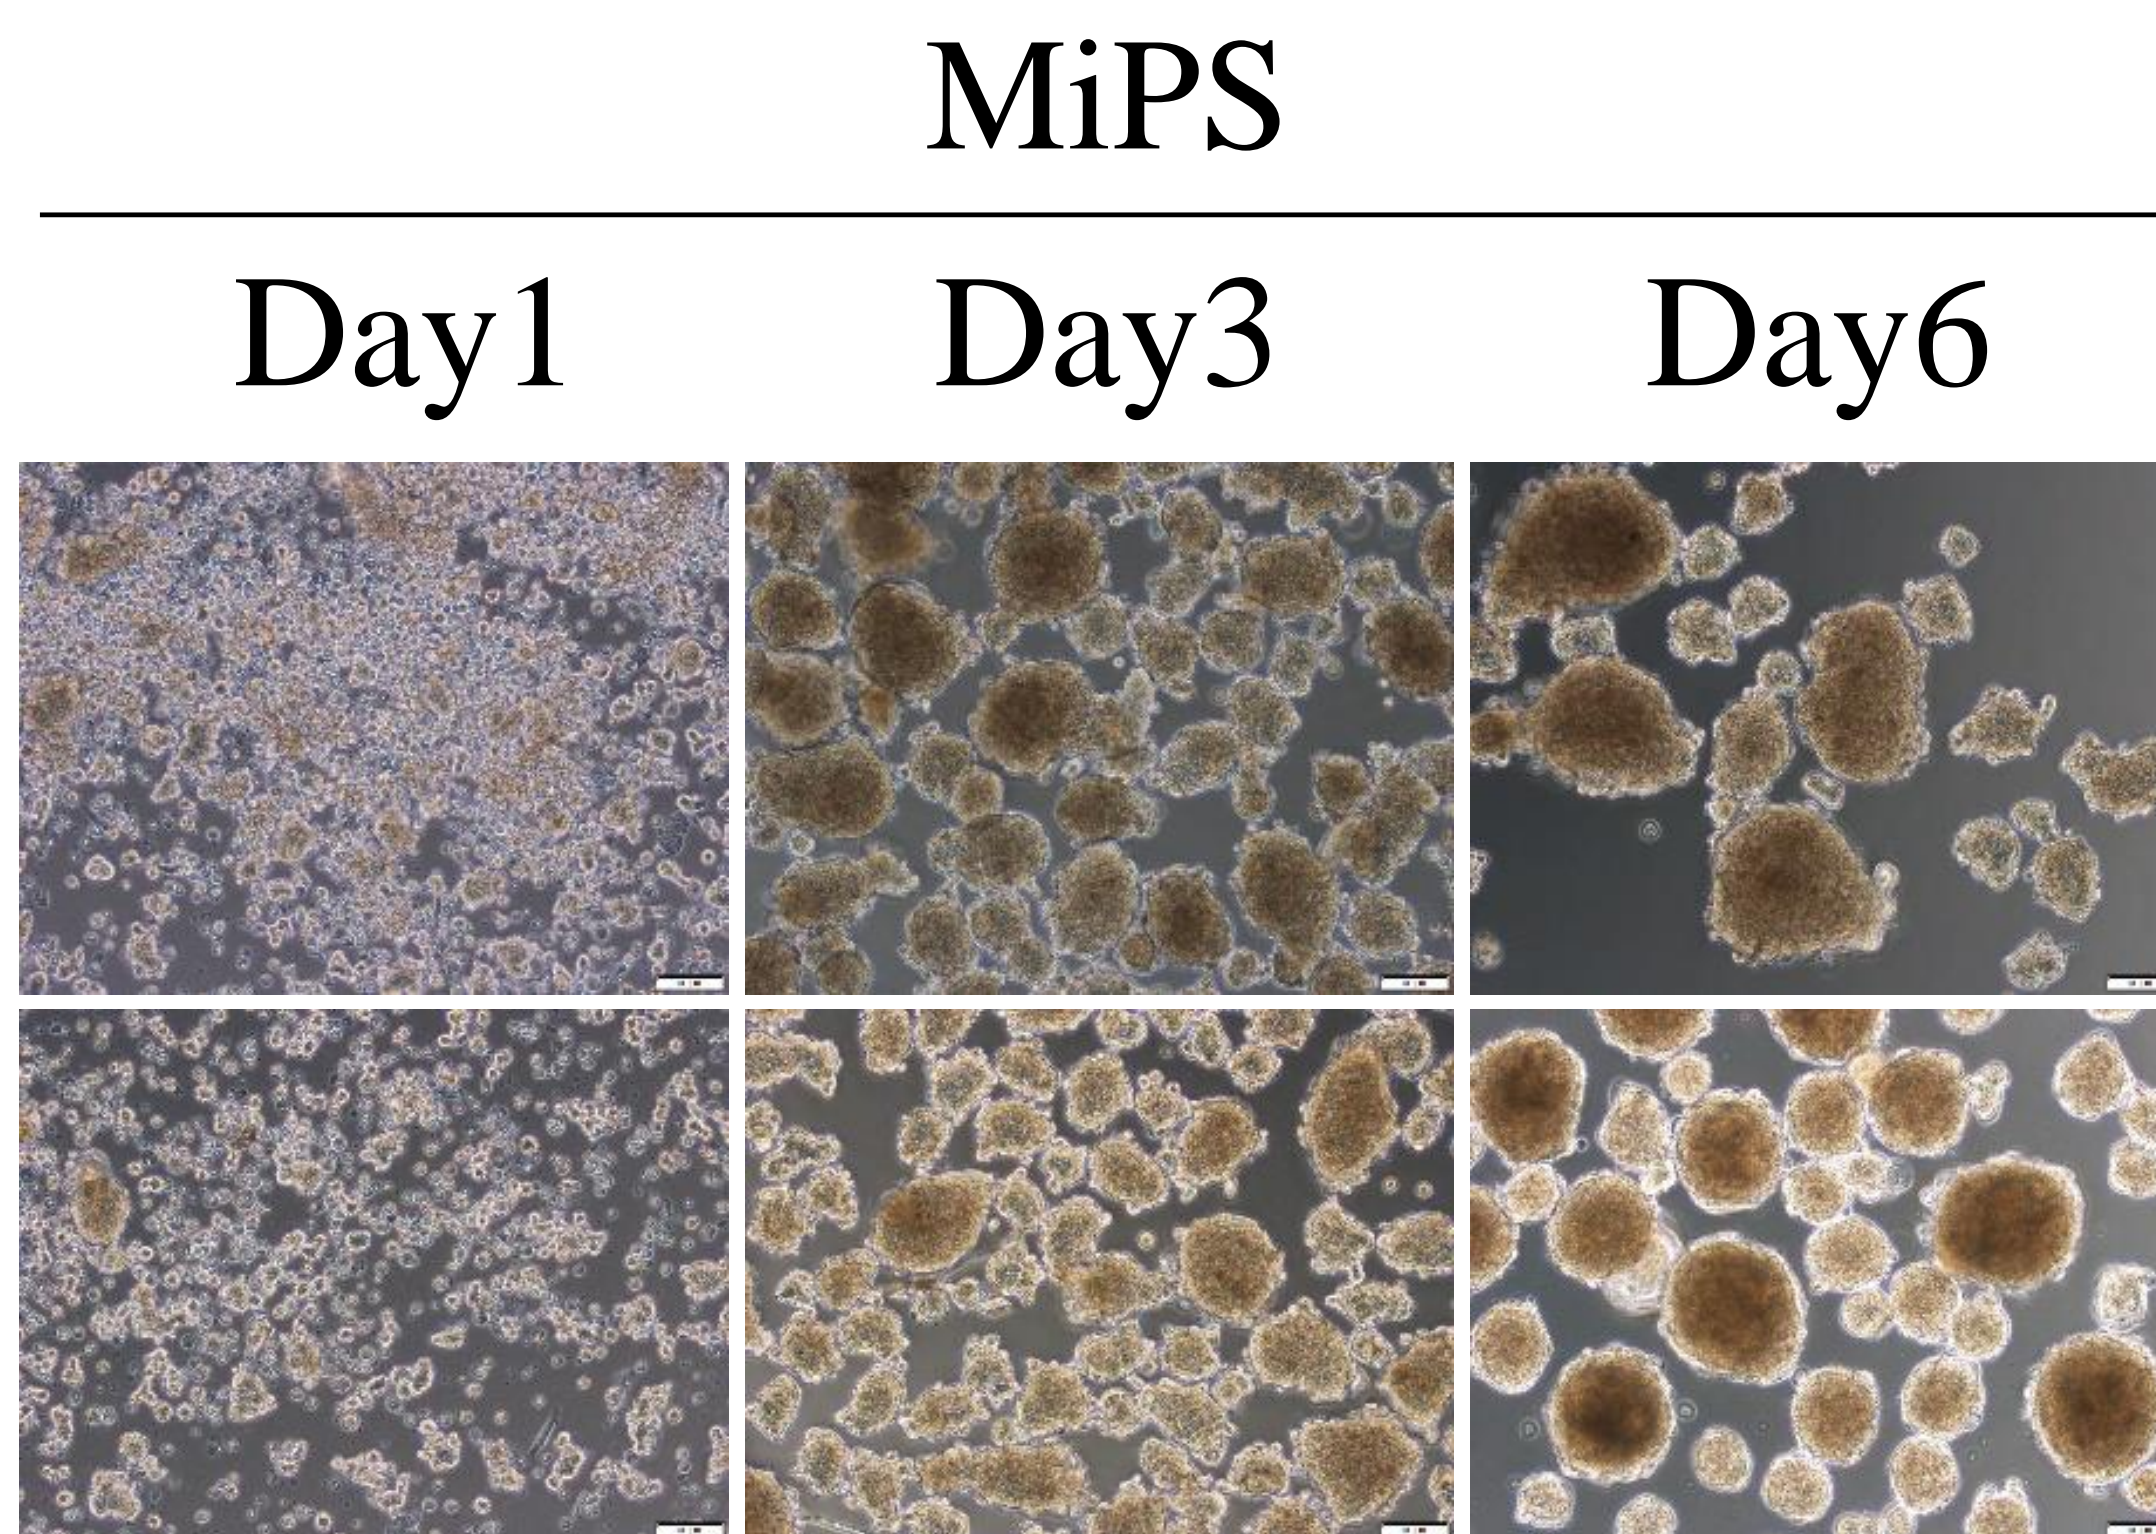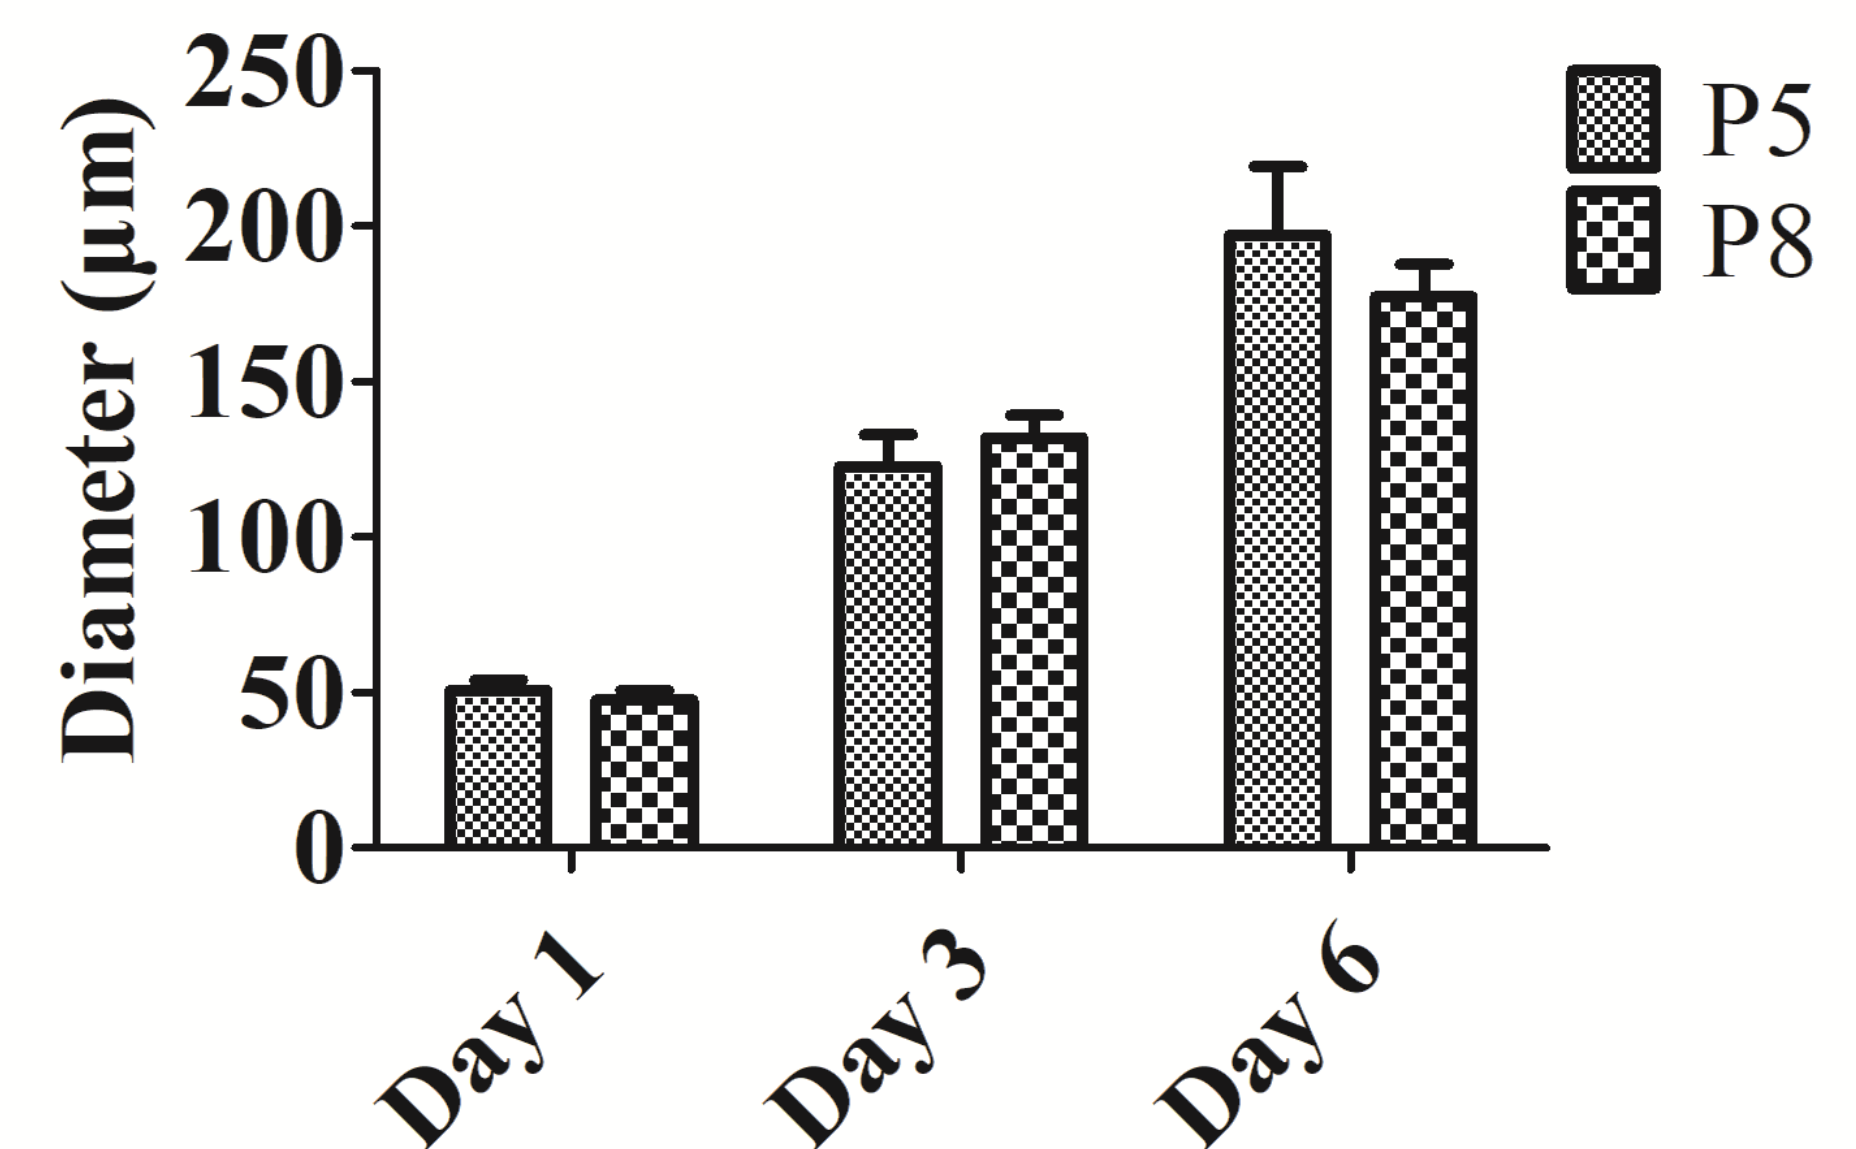**B**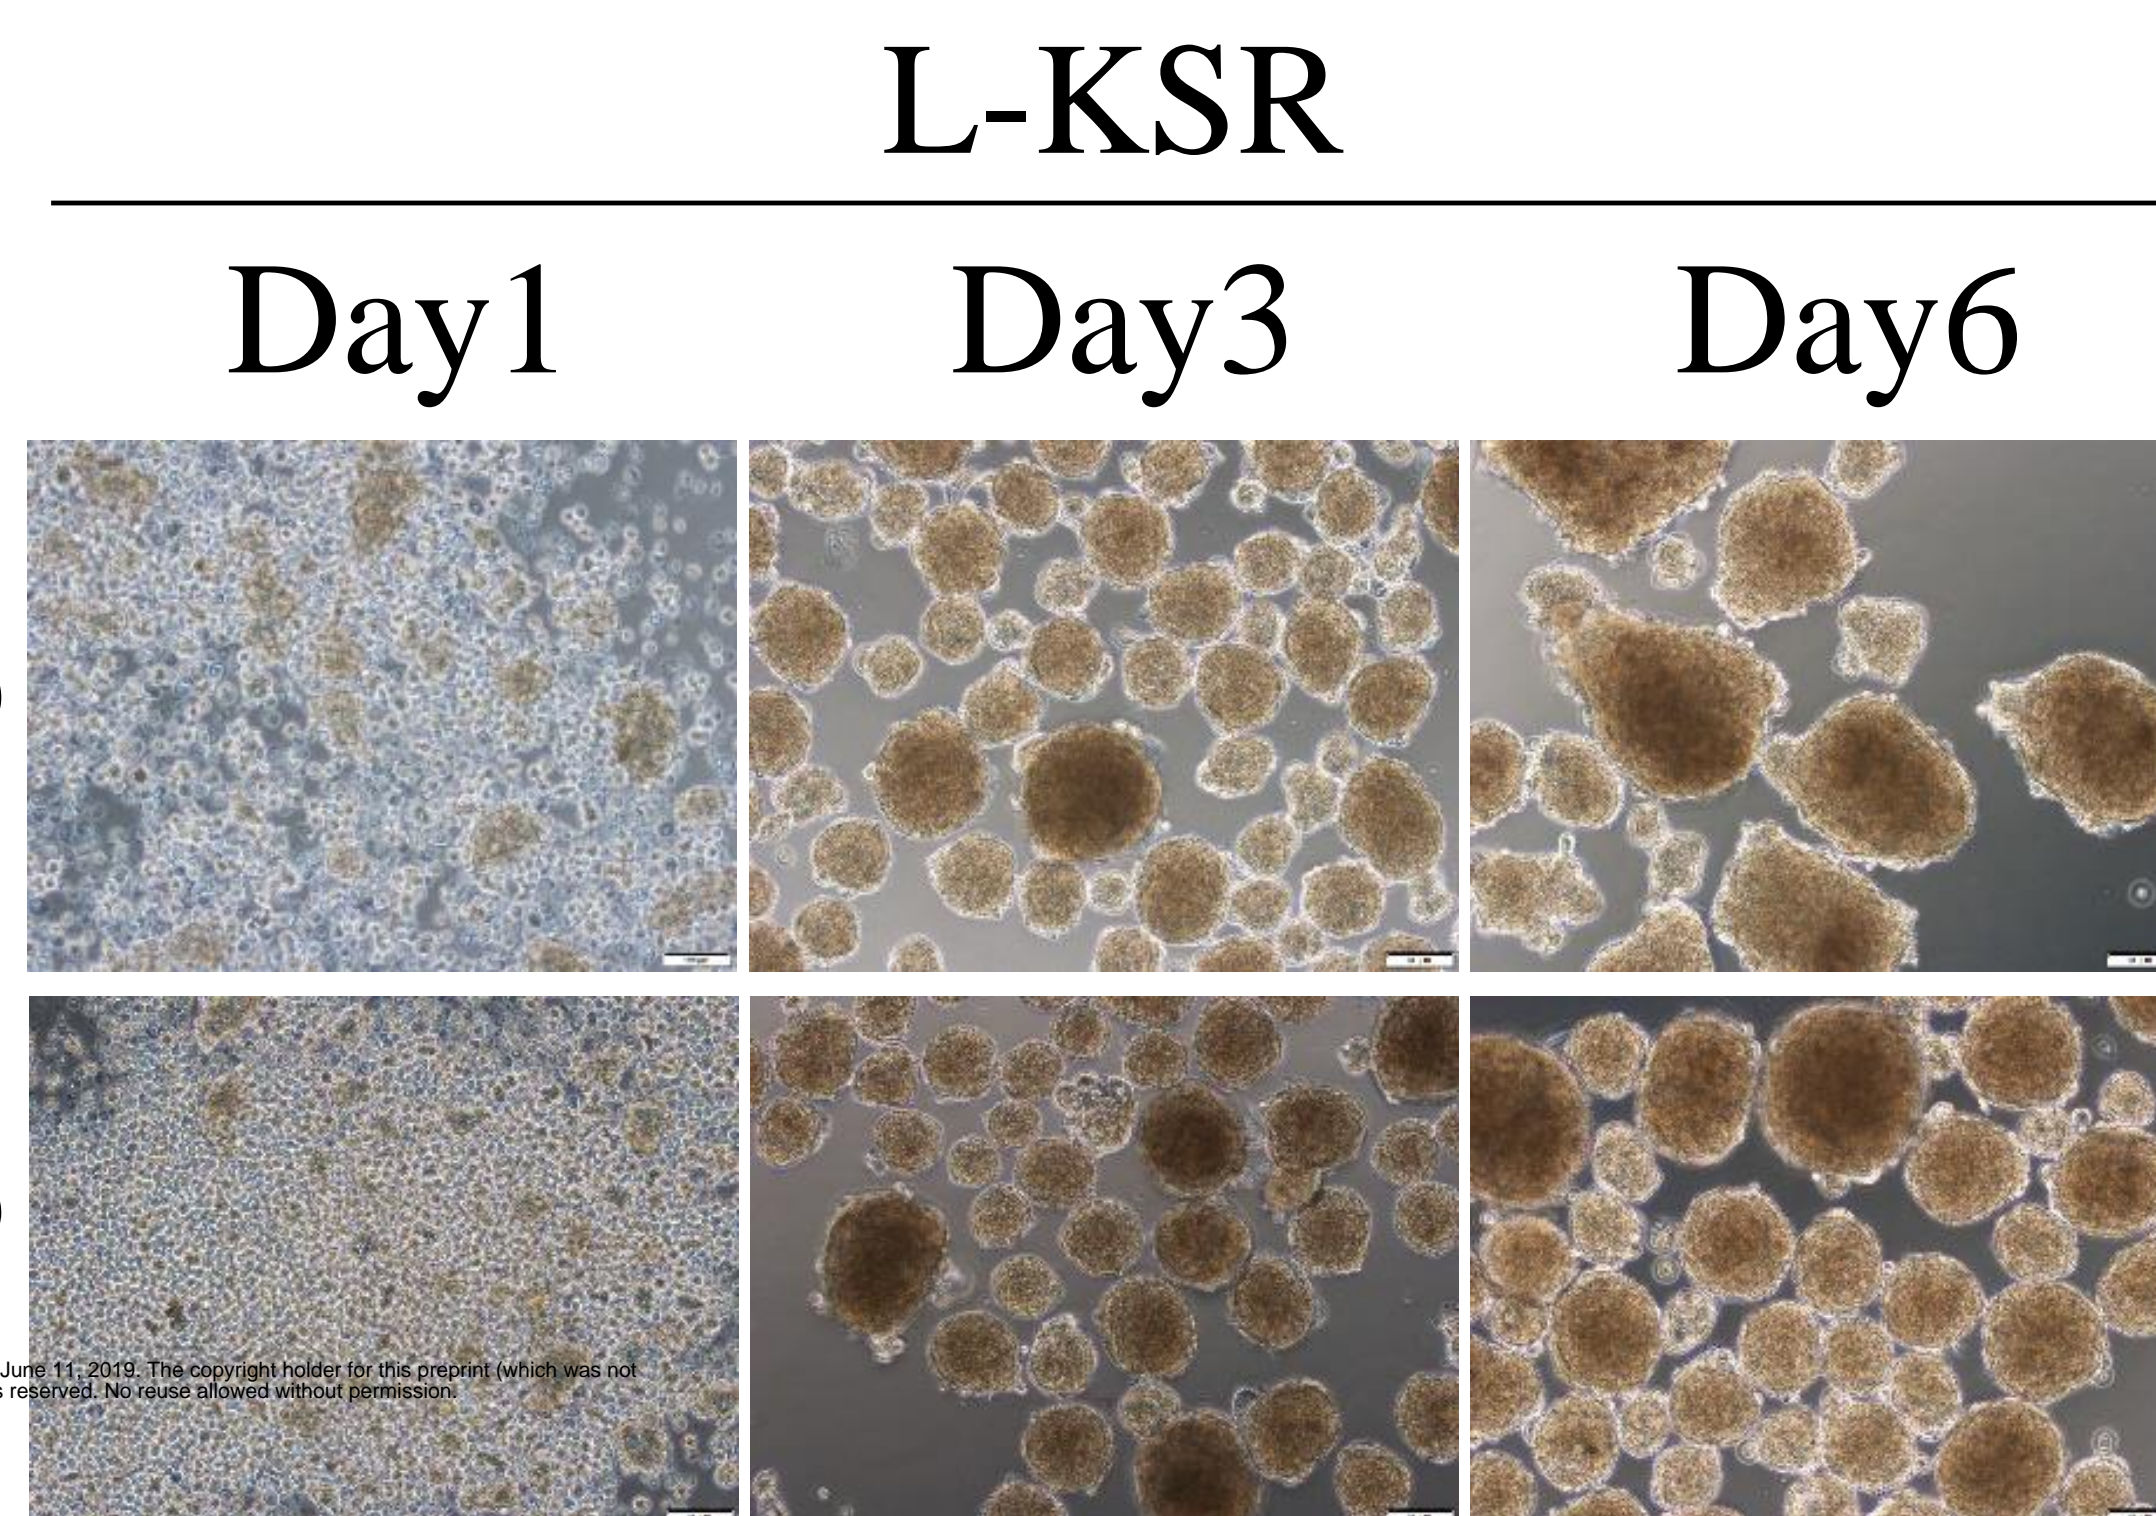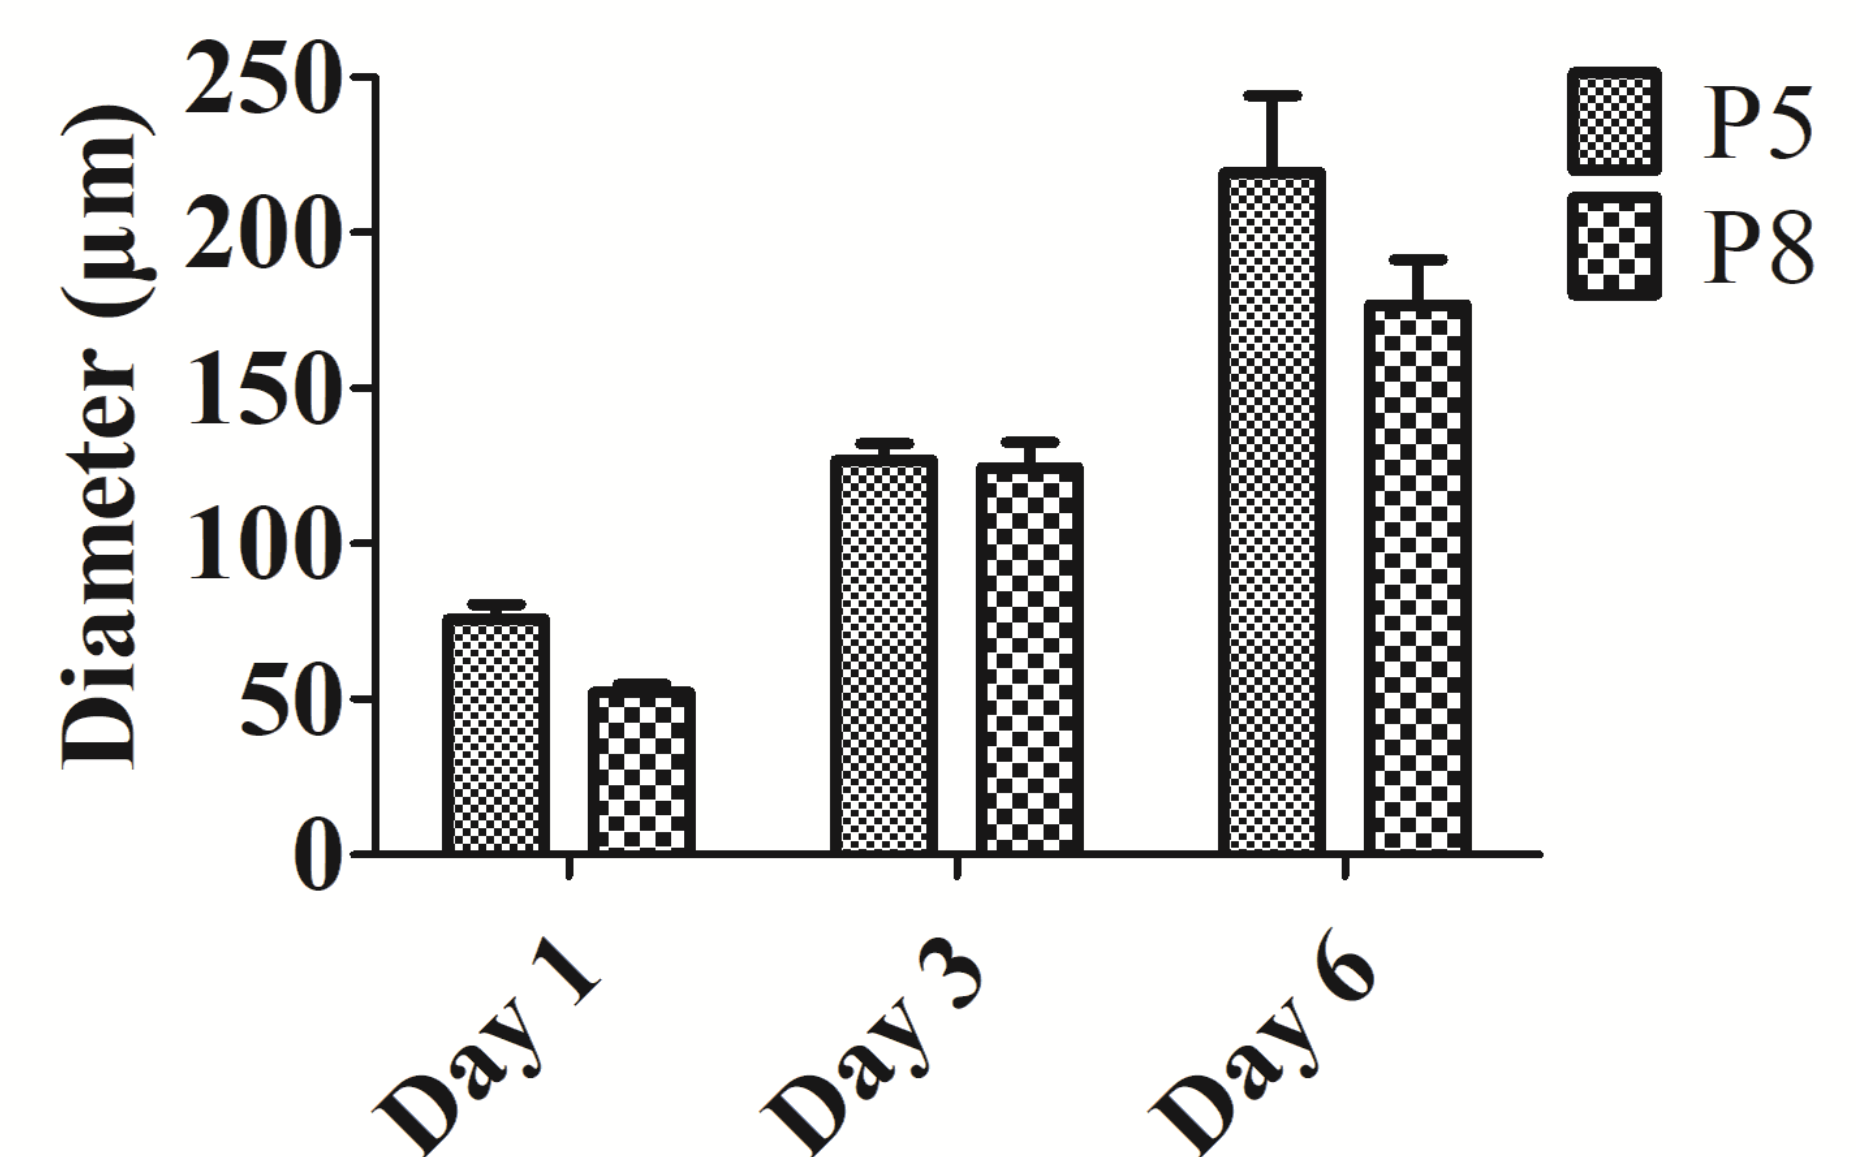

**Figure 2 MSCs at higher passage retain the ability to form spheroids in medium containing KSR.**

(A) MSCs at P5 and P8 generated spheroids in MiPS at day 1, 3 and 6 on tissue culture dishes. Statistical analysis of MSC spheroid mean diameter cultured in MiPS; (B) MSCs at P5 and P8 generated spheroids in L-KSR at day 1, 3 and 6. Statistical analysis of MSC spheroid mean diameter cultured in KSR. Scale bars:100mm



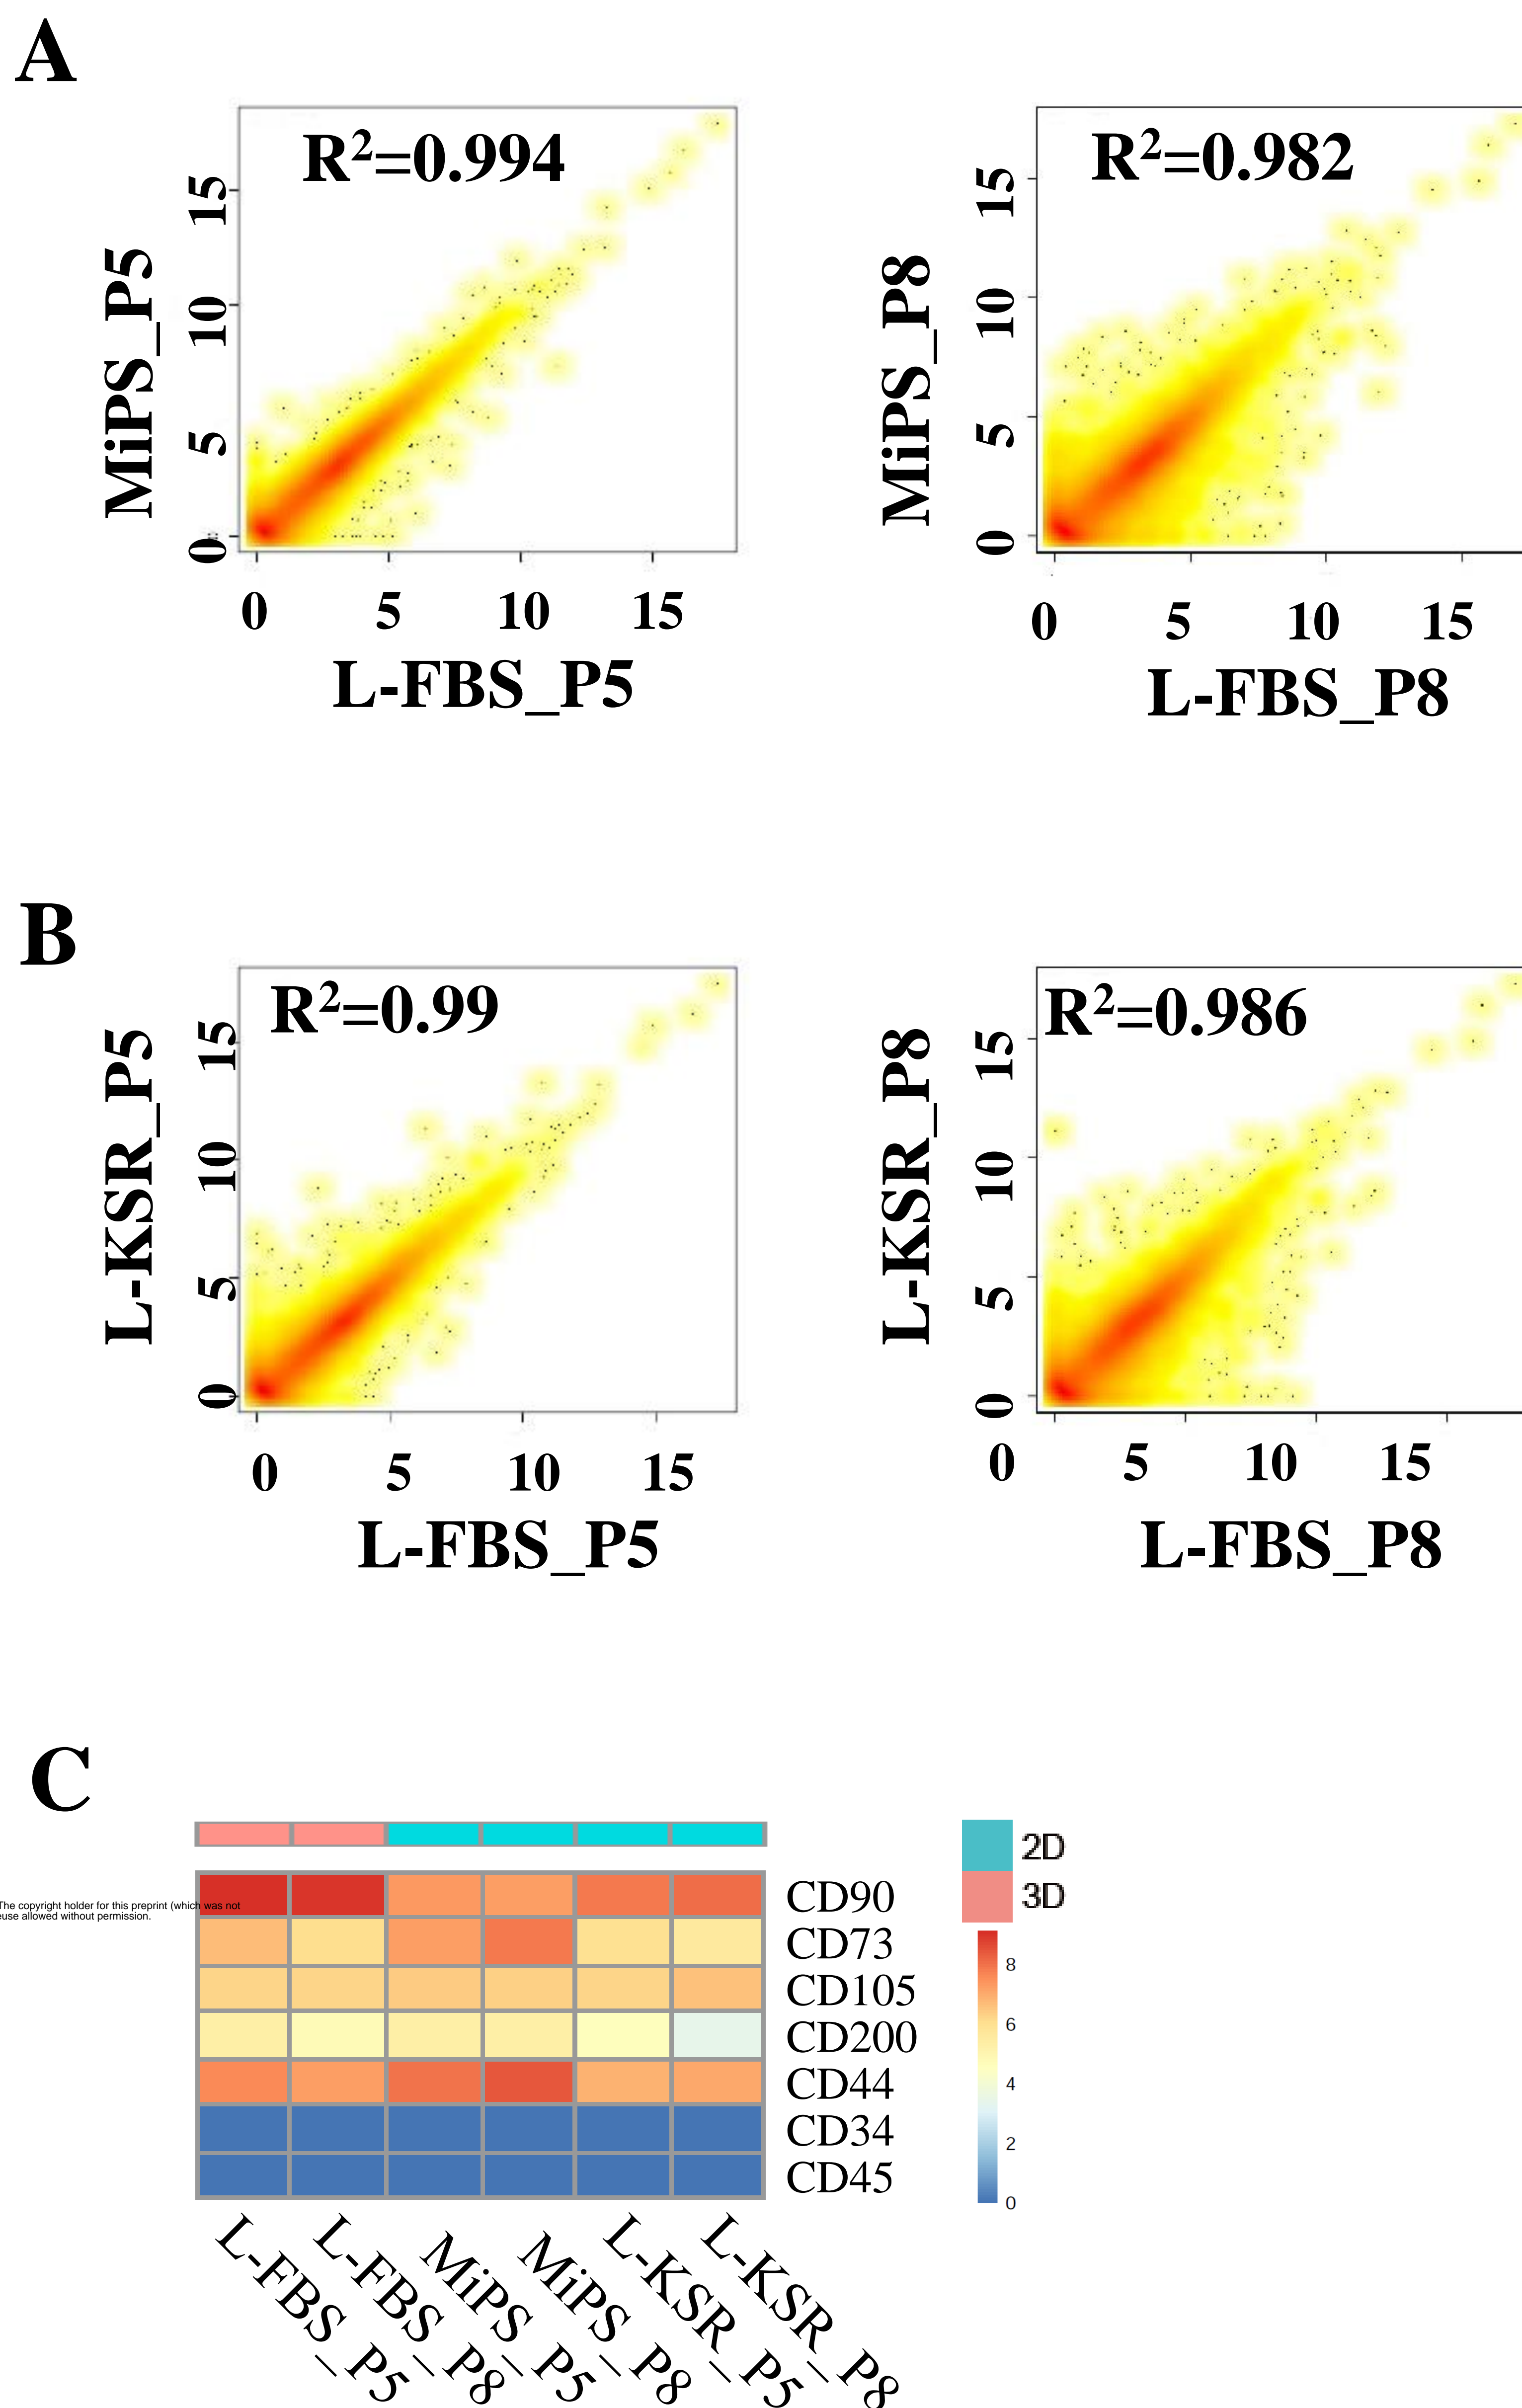

**Figure 3 Transcriptomic correlation analysis of spheroids at day 6 at P5 and P8.** (A-B) Comparison of RNA-Seq gene expression profiles between spheroids in MiPS/L-KSR at P5 and P8 and their corresponding FBS control.  $R^2$  stands for correlation coefficient; (C) Heat map shows the gene expression level of several specific makers of hMSCs.



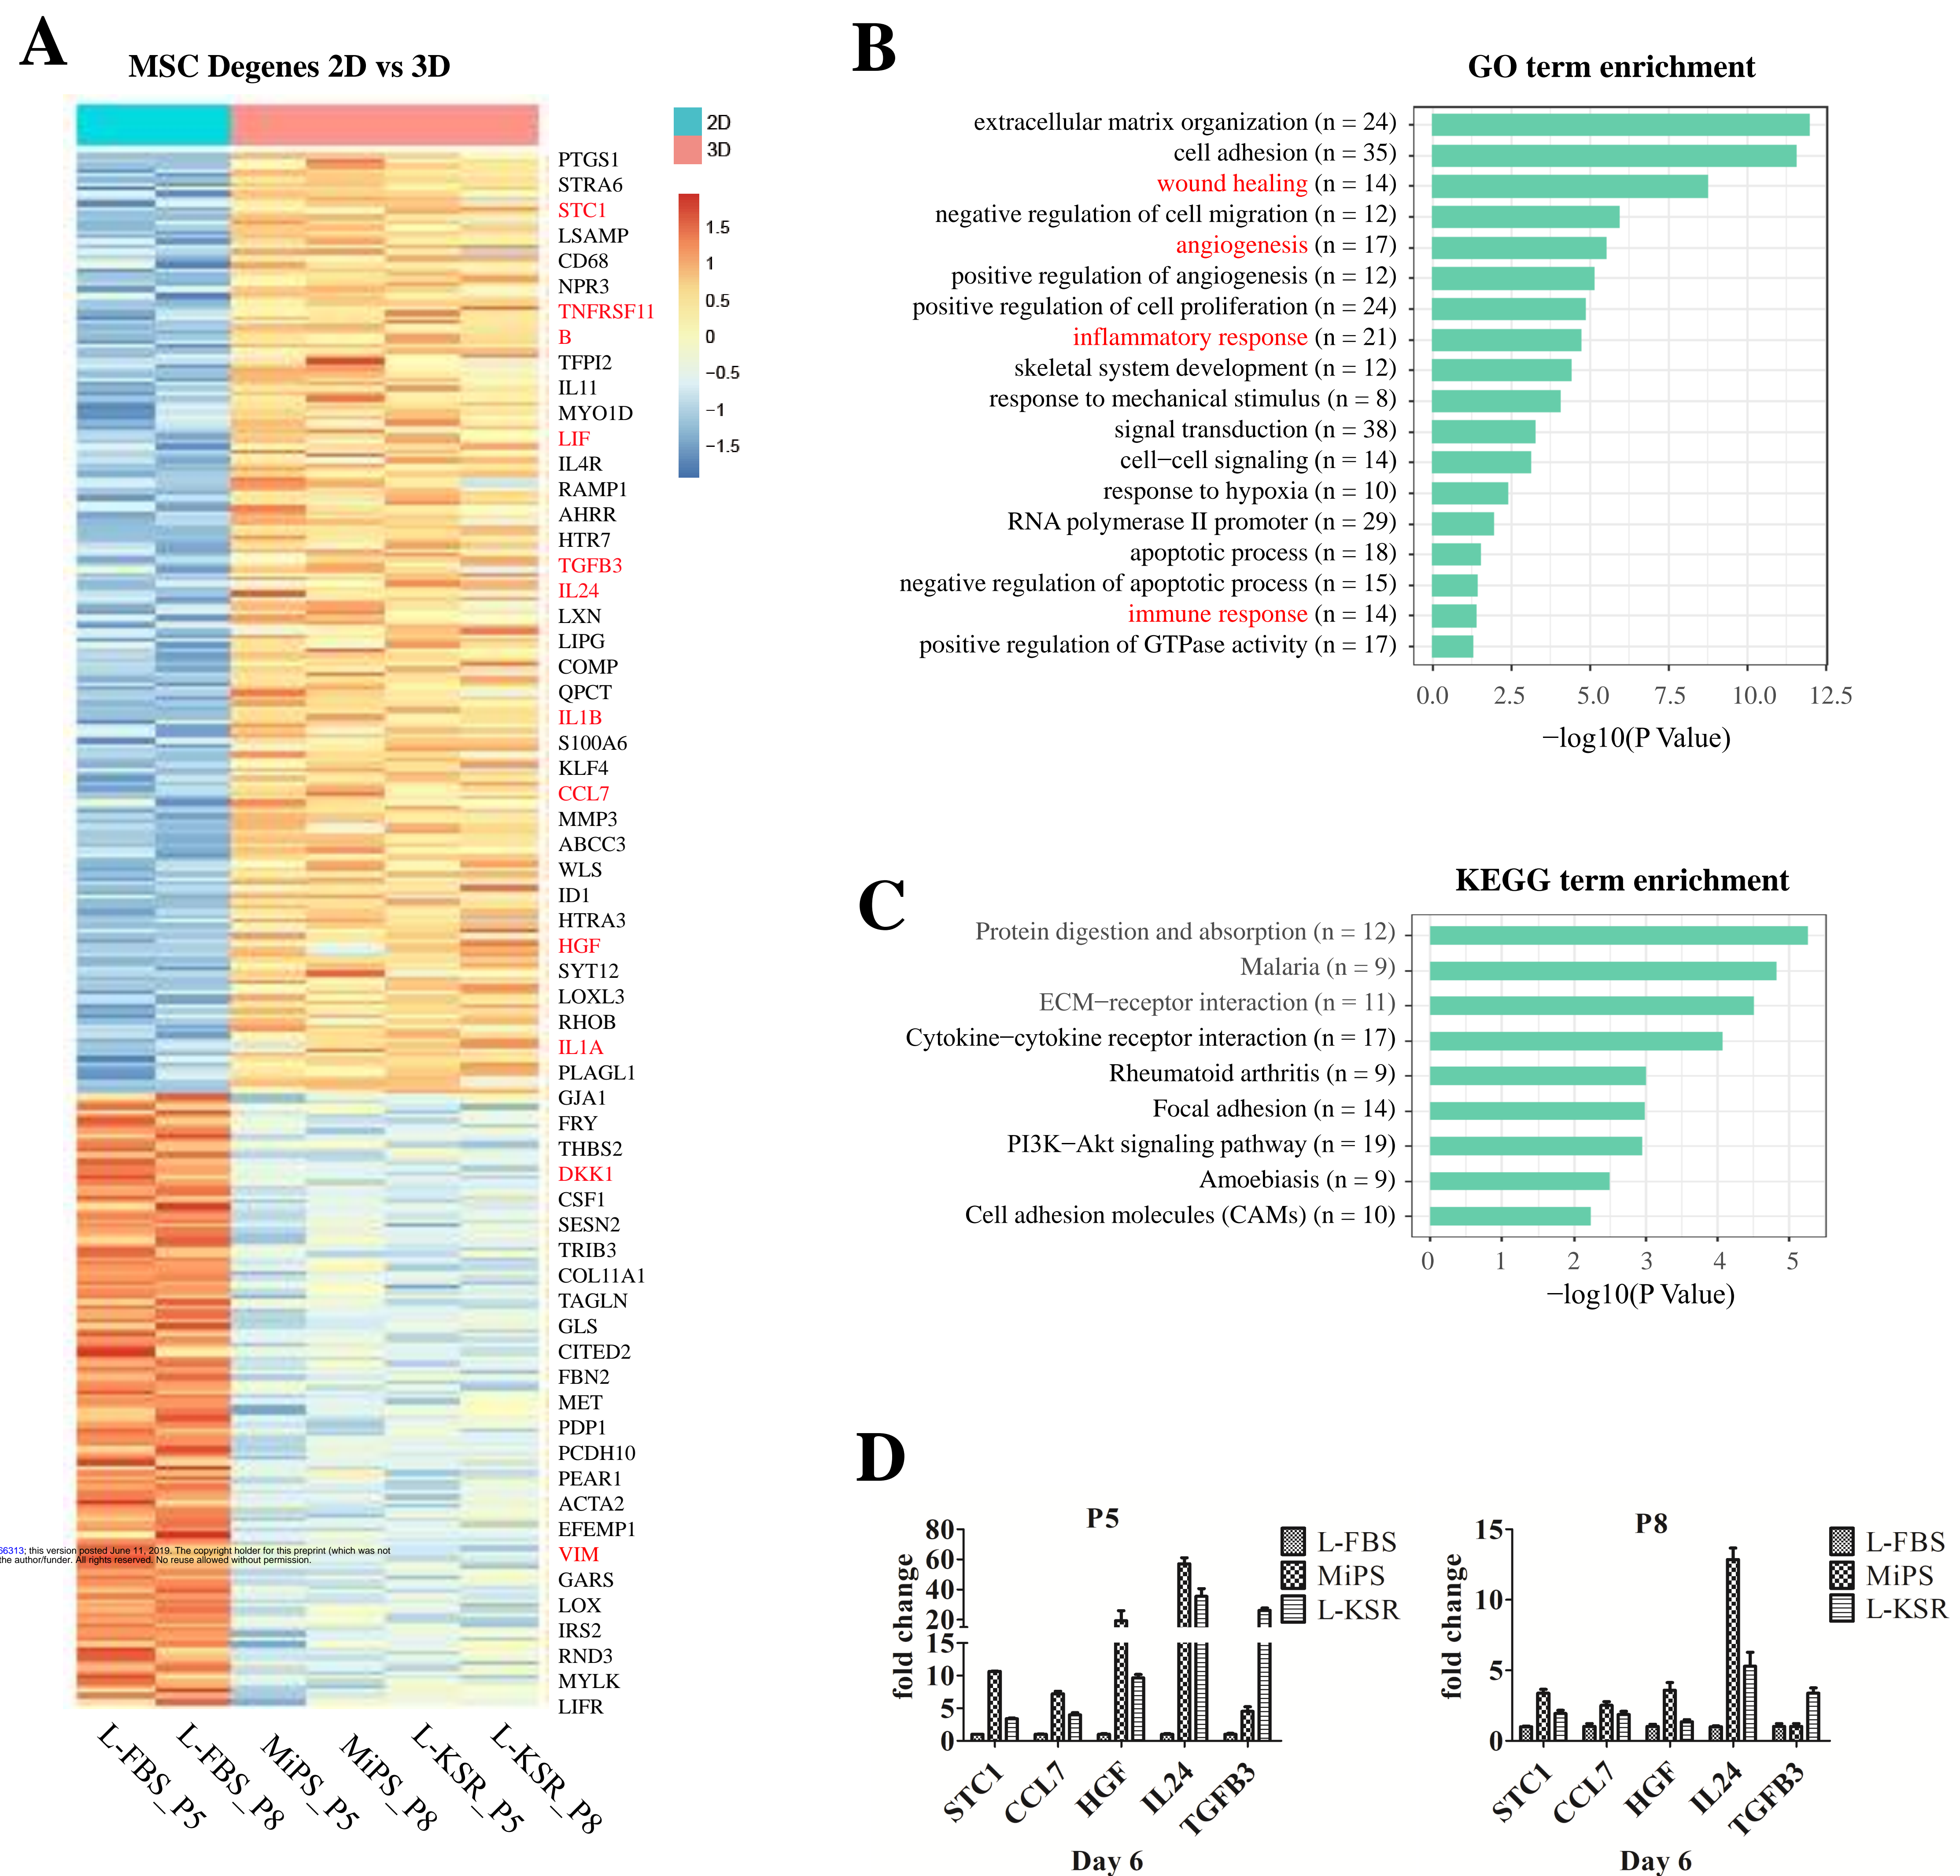

**Figure 4 Transcriptomic expression analysis of hMSC spheroids.**

(A) Heat-map displaying the up and down-regulated gene expression levels between 3D spheroids (both in MiPS and L-KSR and 2D normal MSCs (in L-FBS medium) at day 6 at P5 and P8. (B) Gene ontology (GO) analysis between 3D and 2D, “n” indicates gene numbers. (C) KEGG analysis between 3D and 2D. (D) qPCR results analysis of *STC1*, *CCL7*, *HGF*, *IL24* and *TGFB3* between 3D and 2D cells at P5 and P8 at day 6.



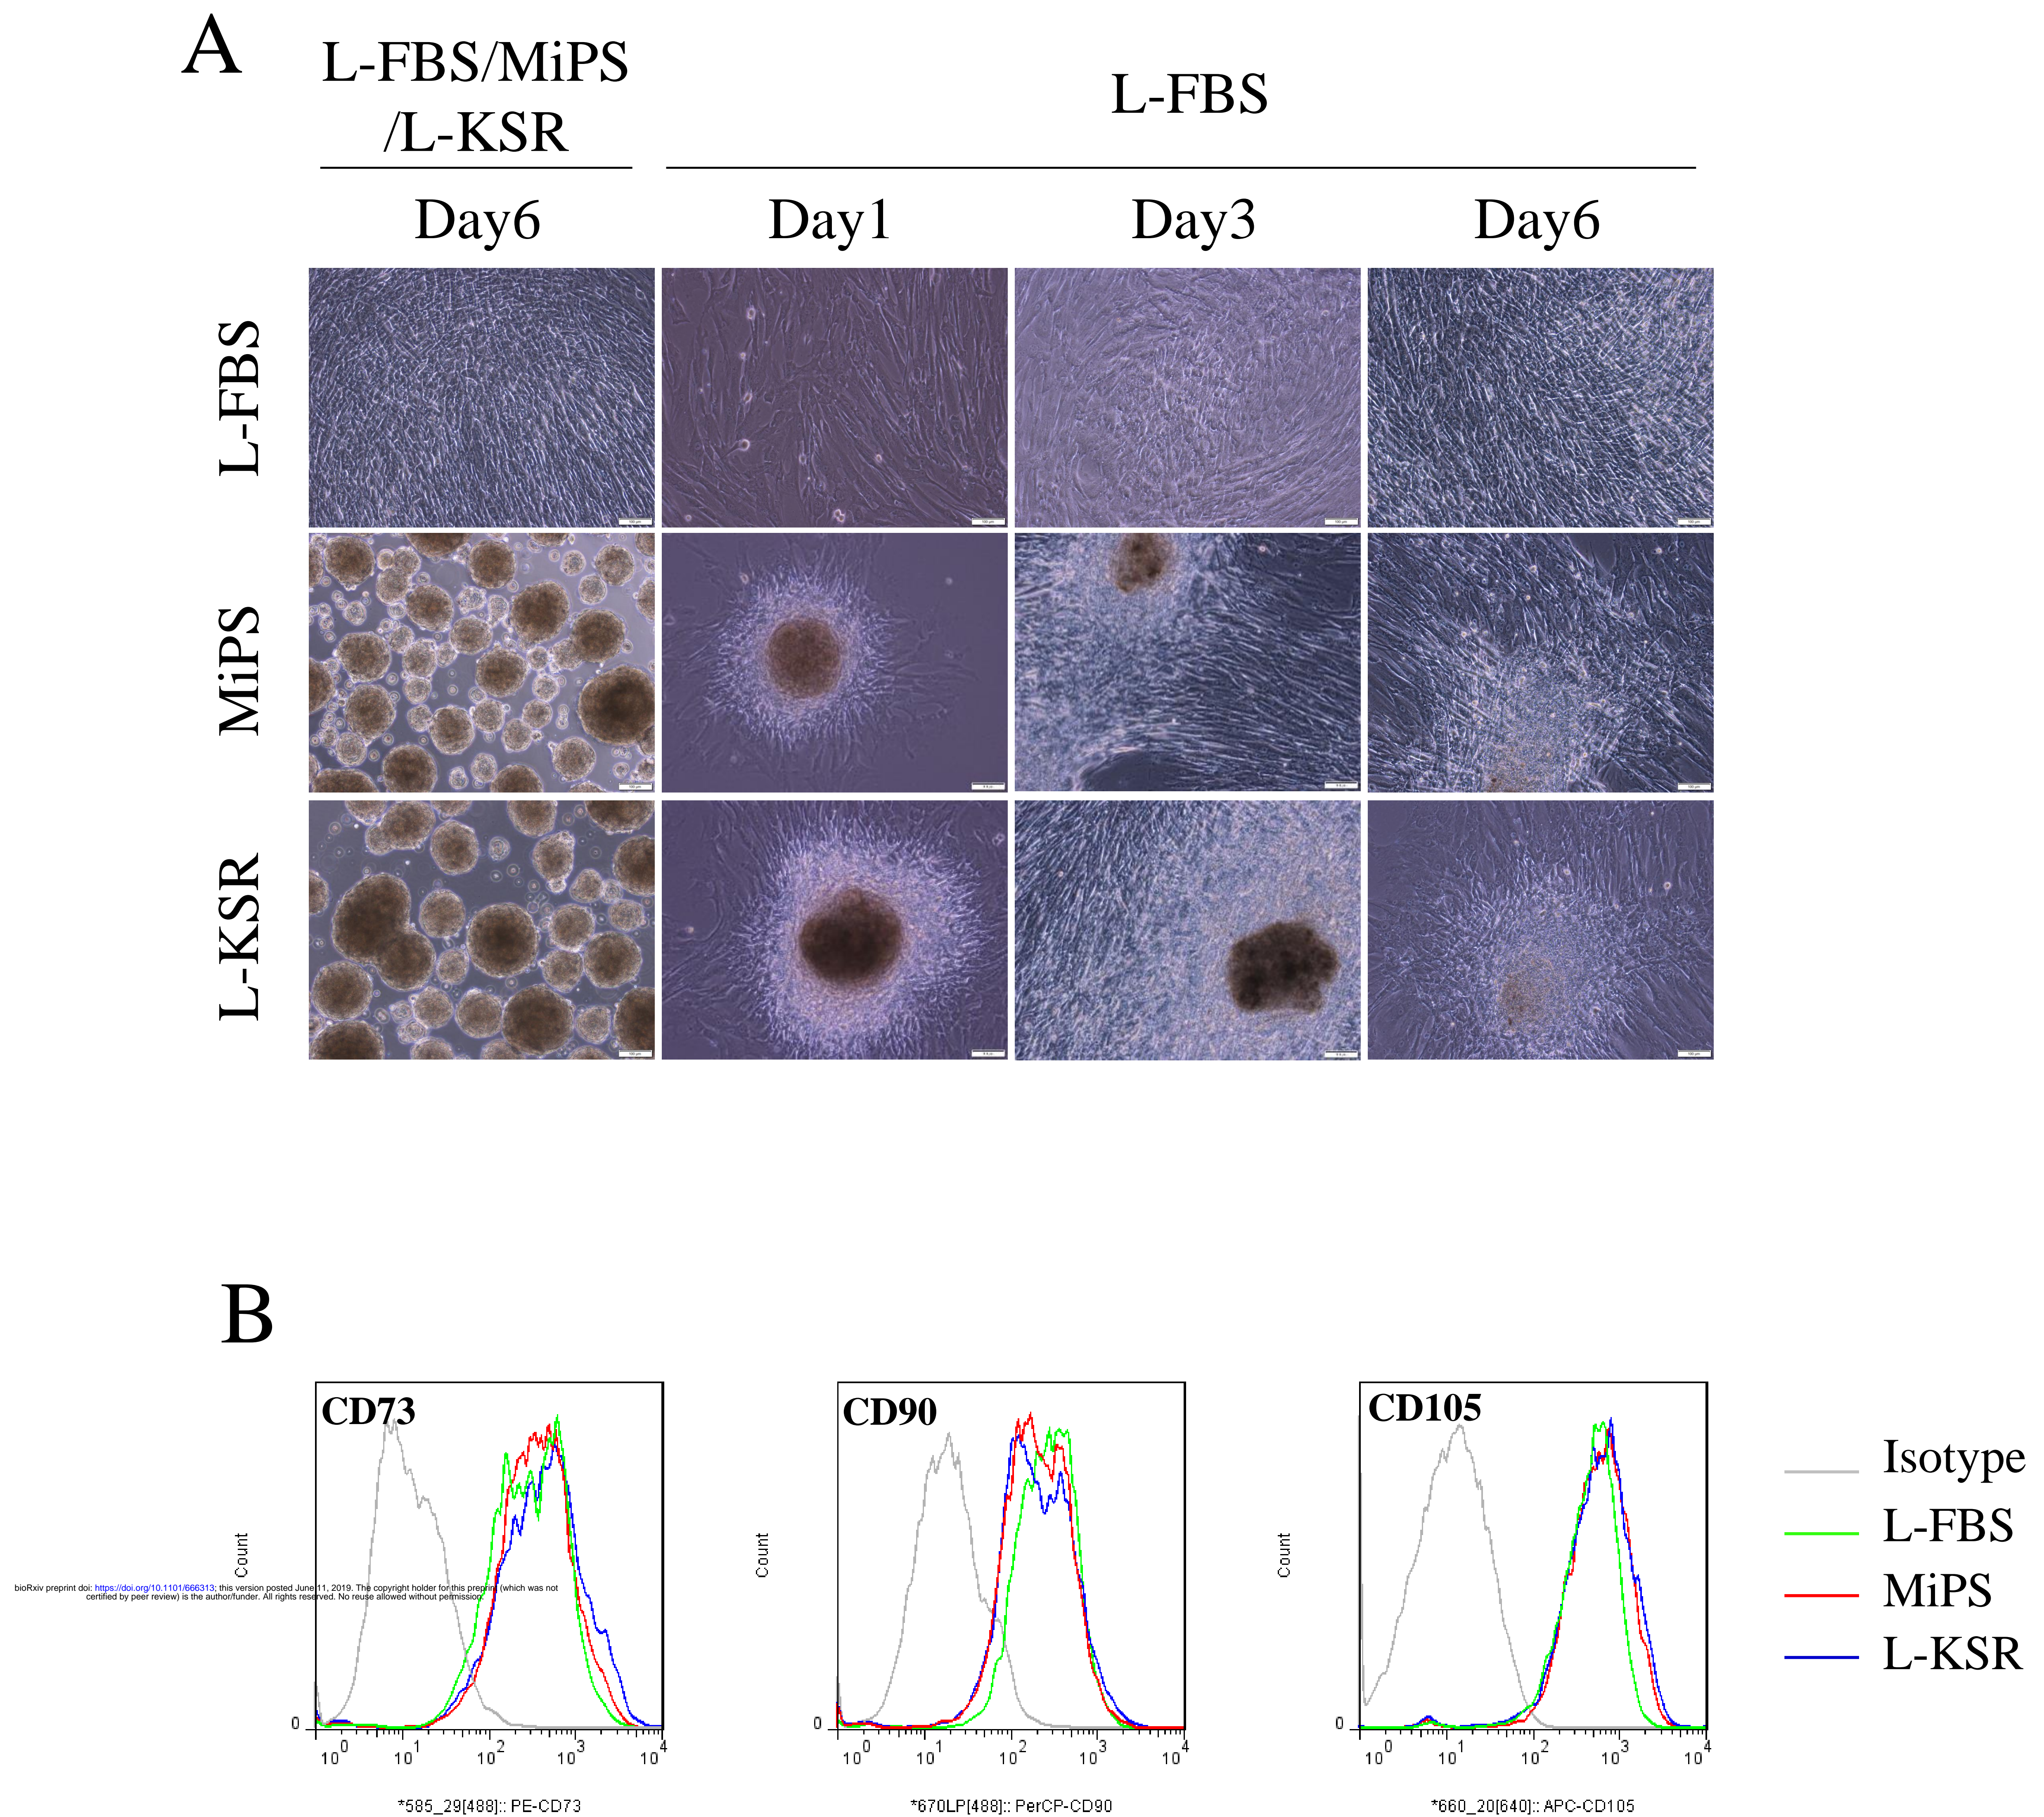

**Figure 5 Spheroid recovered hMSCs retains mesenchymal stem cell features.**

**(A)** Cells in spheroids at day 6 at passage 8 in MiPS/L-KSR migrated out and adhered to tissue culture dishes when reseeded in L-FBS medium. Cells cultured in FBS as a control; **(B)** FACS analysis of MSC positive markers CD73, CD90 and CD105 of spheroid recovered hMSCs in MiPS/L-KSR. Cells cultured in L-FBS as a control. Scale bars:100mm



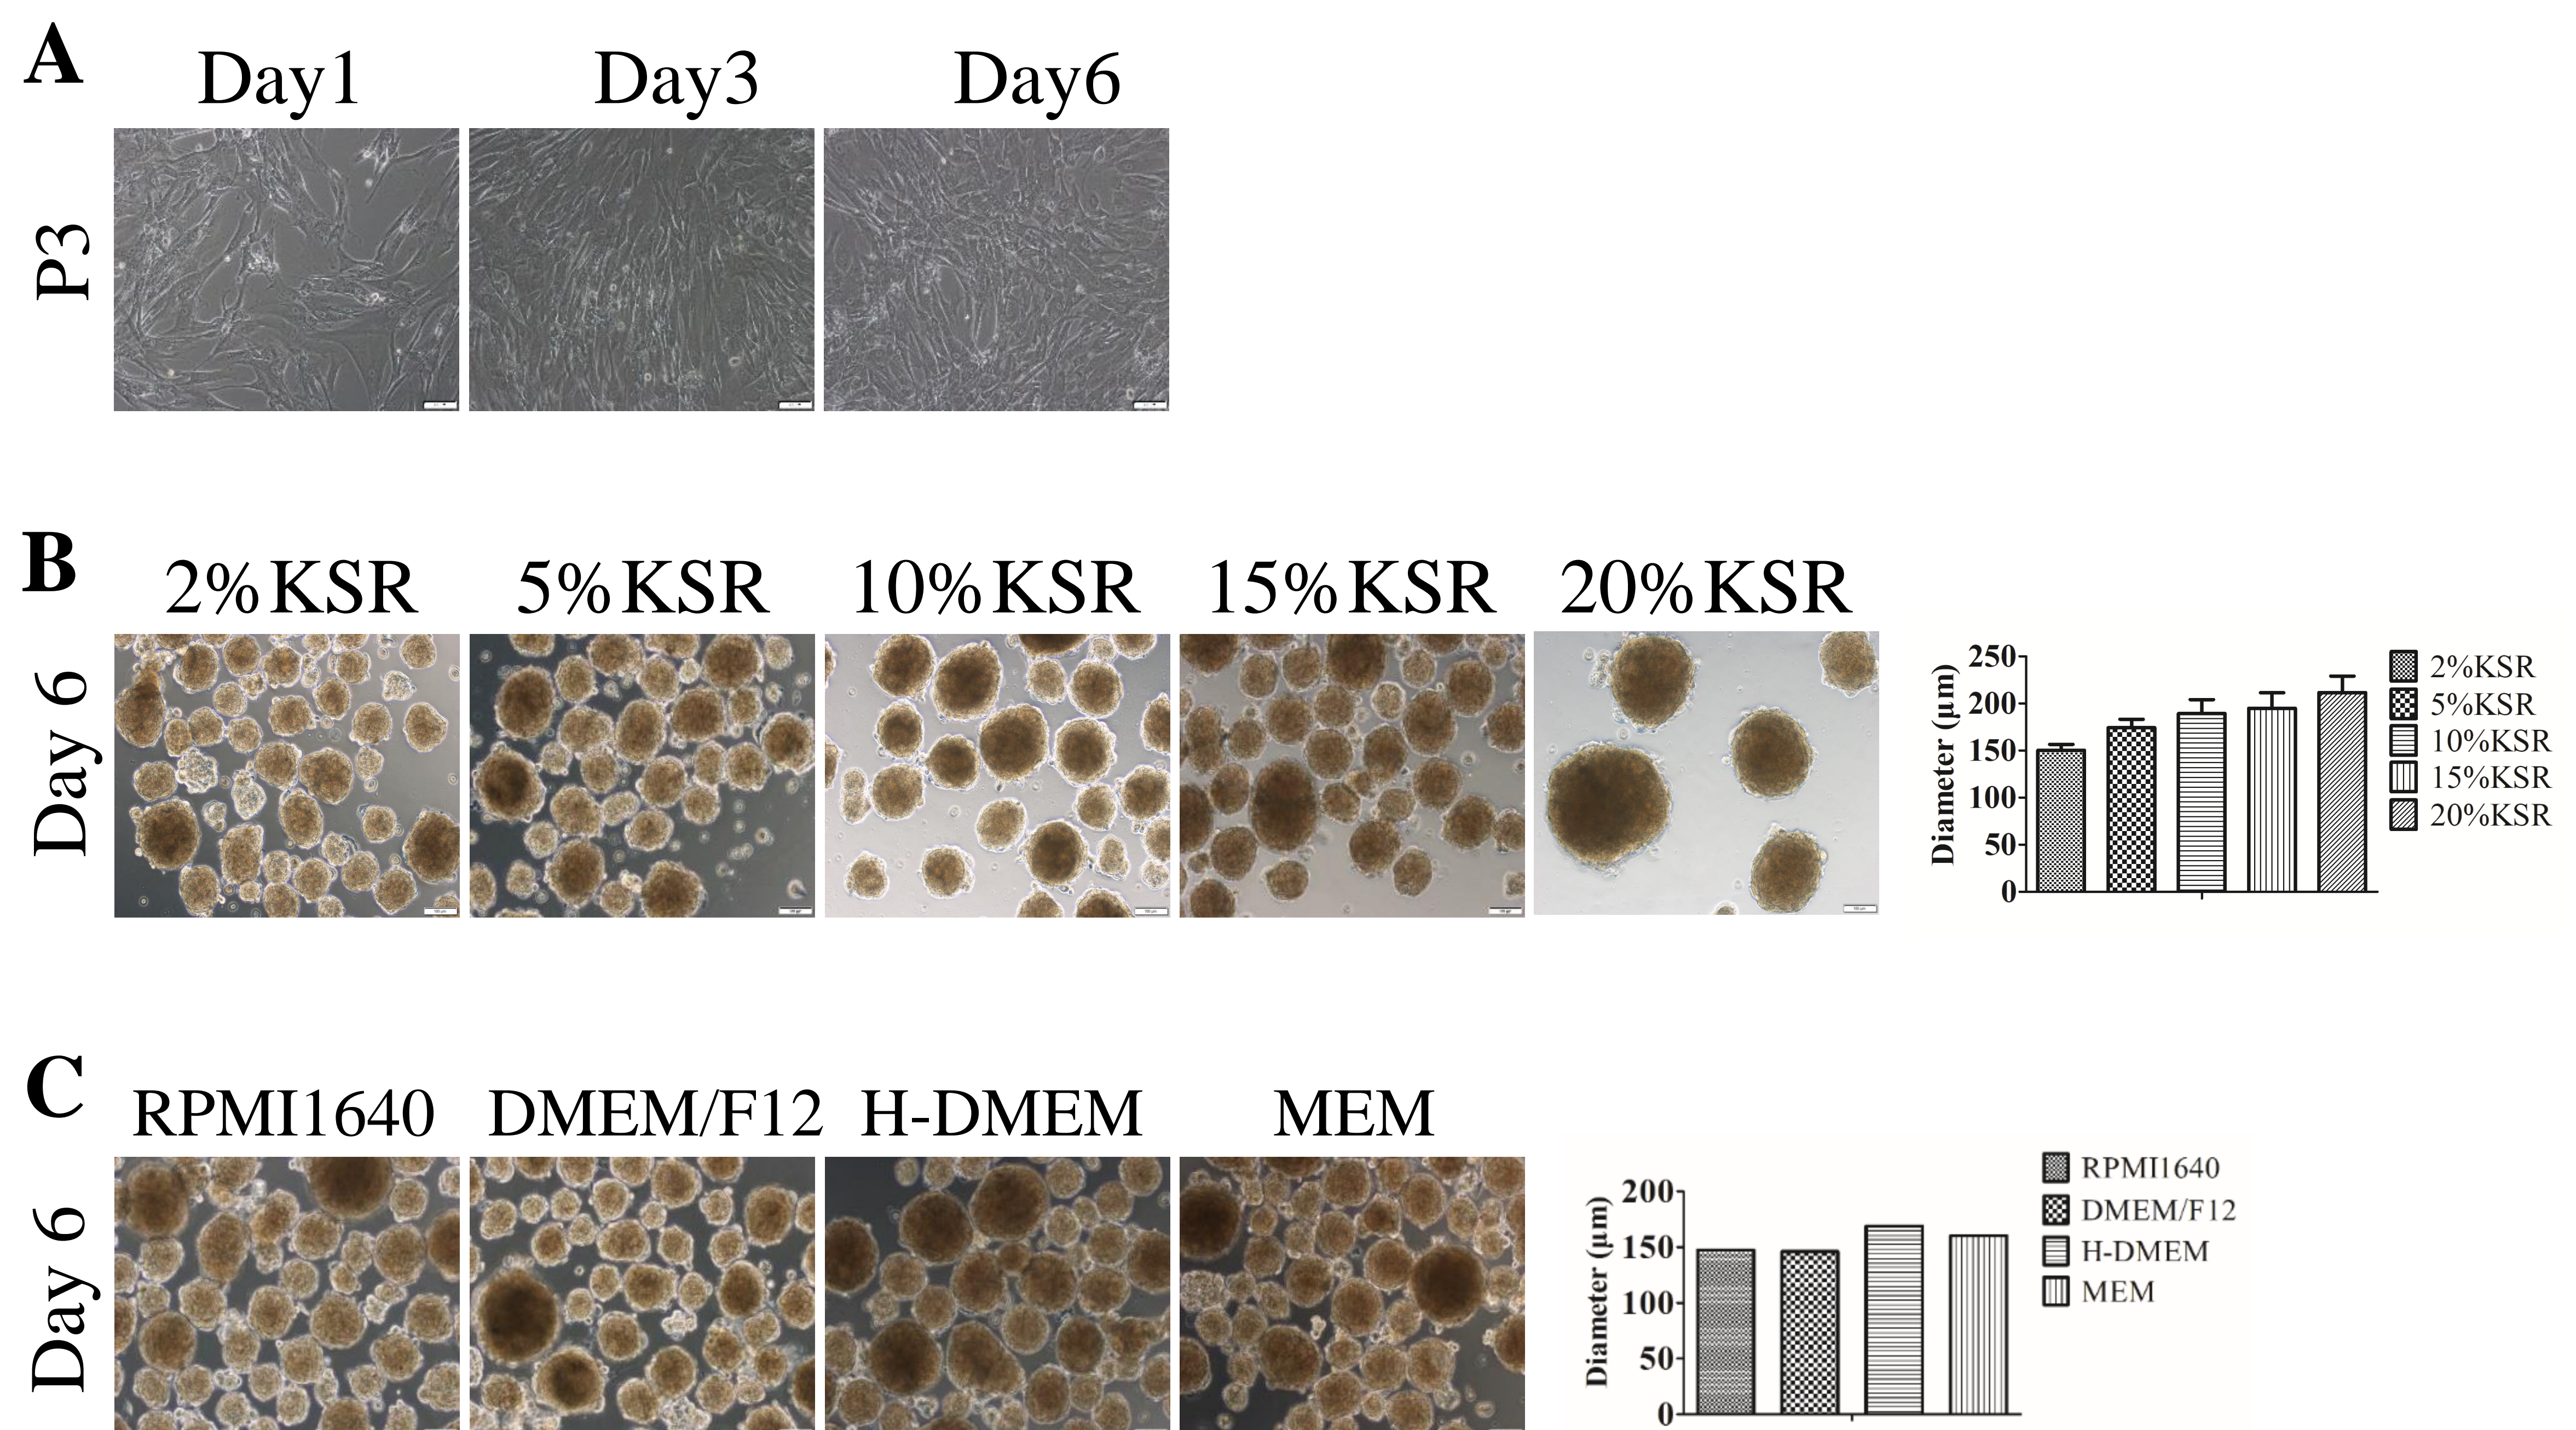

## Figure S1 MSC cells can form spheroids in KSR contained medium.

(A) hMSCs cultured in L-FBS at passage 3; (B) hMSC spheroids at day 6 generated from hMSCs at passage 3 in L-DMEM at the indicated concentration KSR. Statistical analysis of hMSC spheroids mean diameter cultured in different concentrations of KSR in L-DMEM medium; (C) hMSC spheroids at day 6 generated from hMSCs at passage 3 in various basal medium, including RPMI1640、DMEM/F12、H-DMEM、MEM with 20% KSR. Statistical analysis of hMSC spheroids mean diameter cultured in various basal medium with 20% KSR. Scale bars:100μm



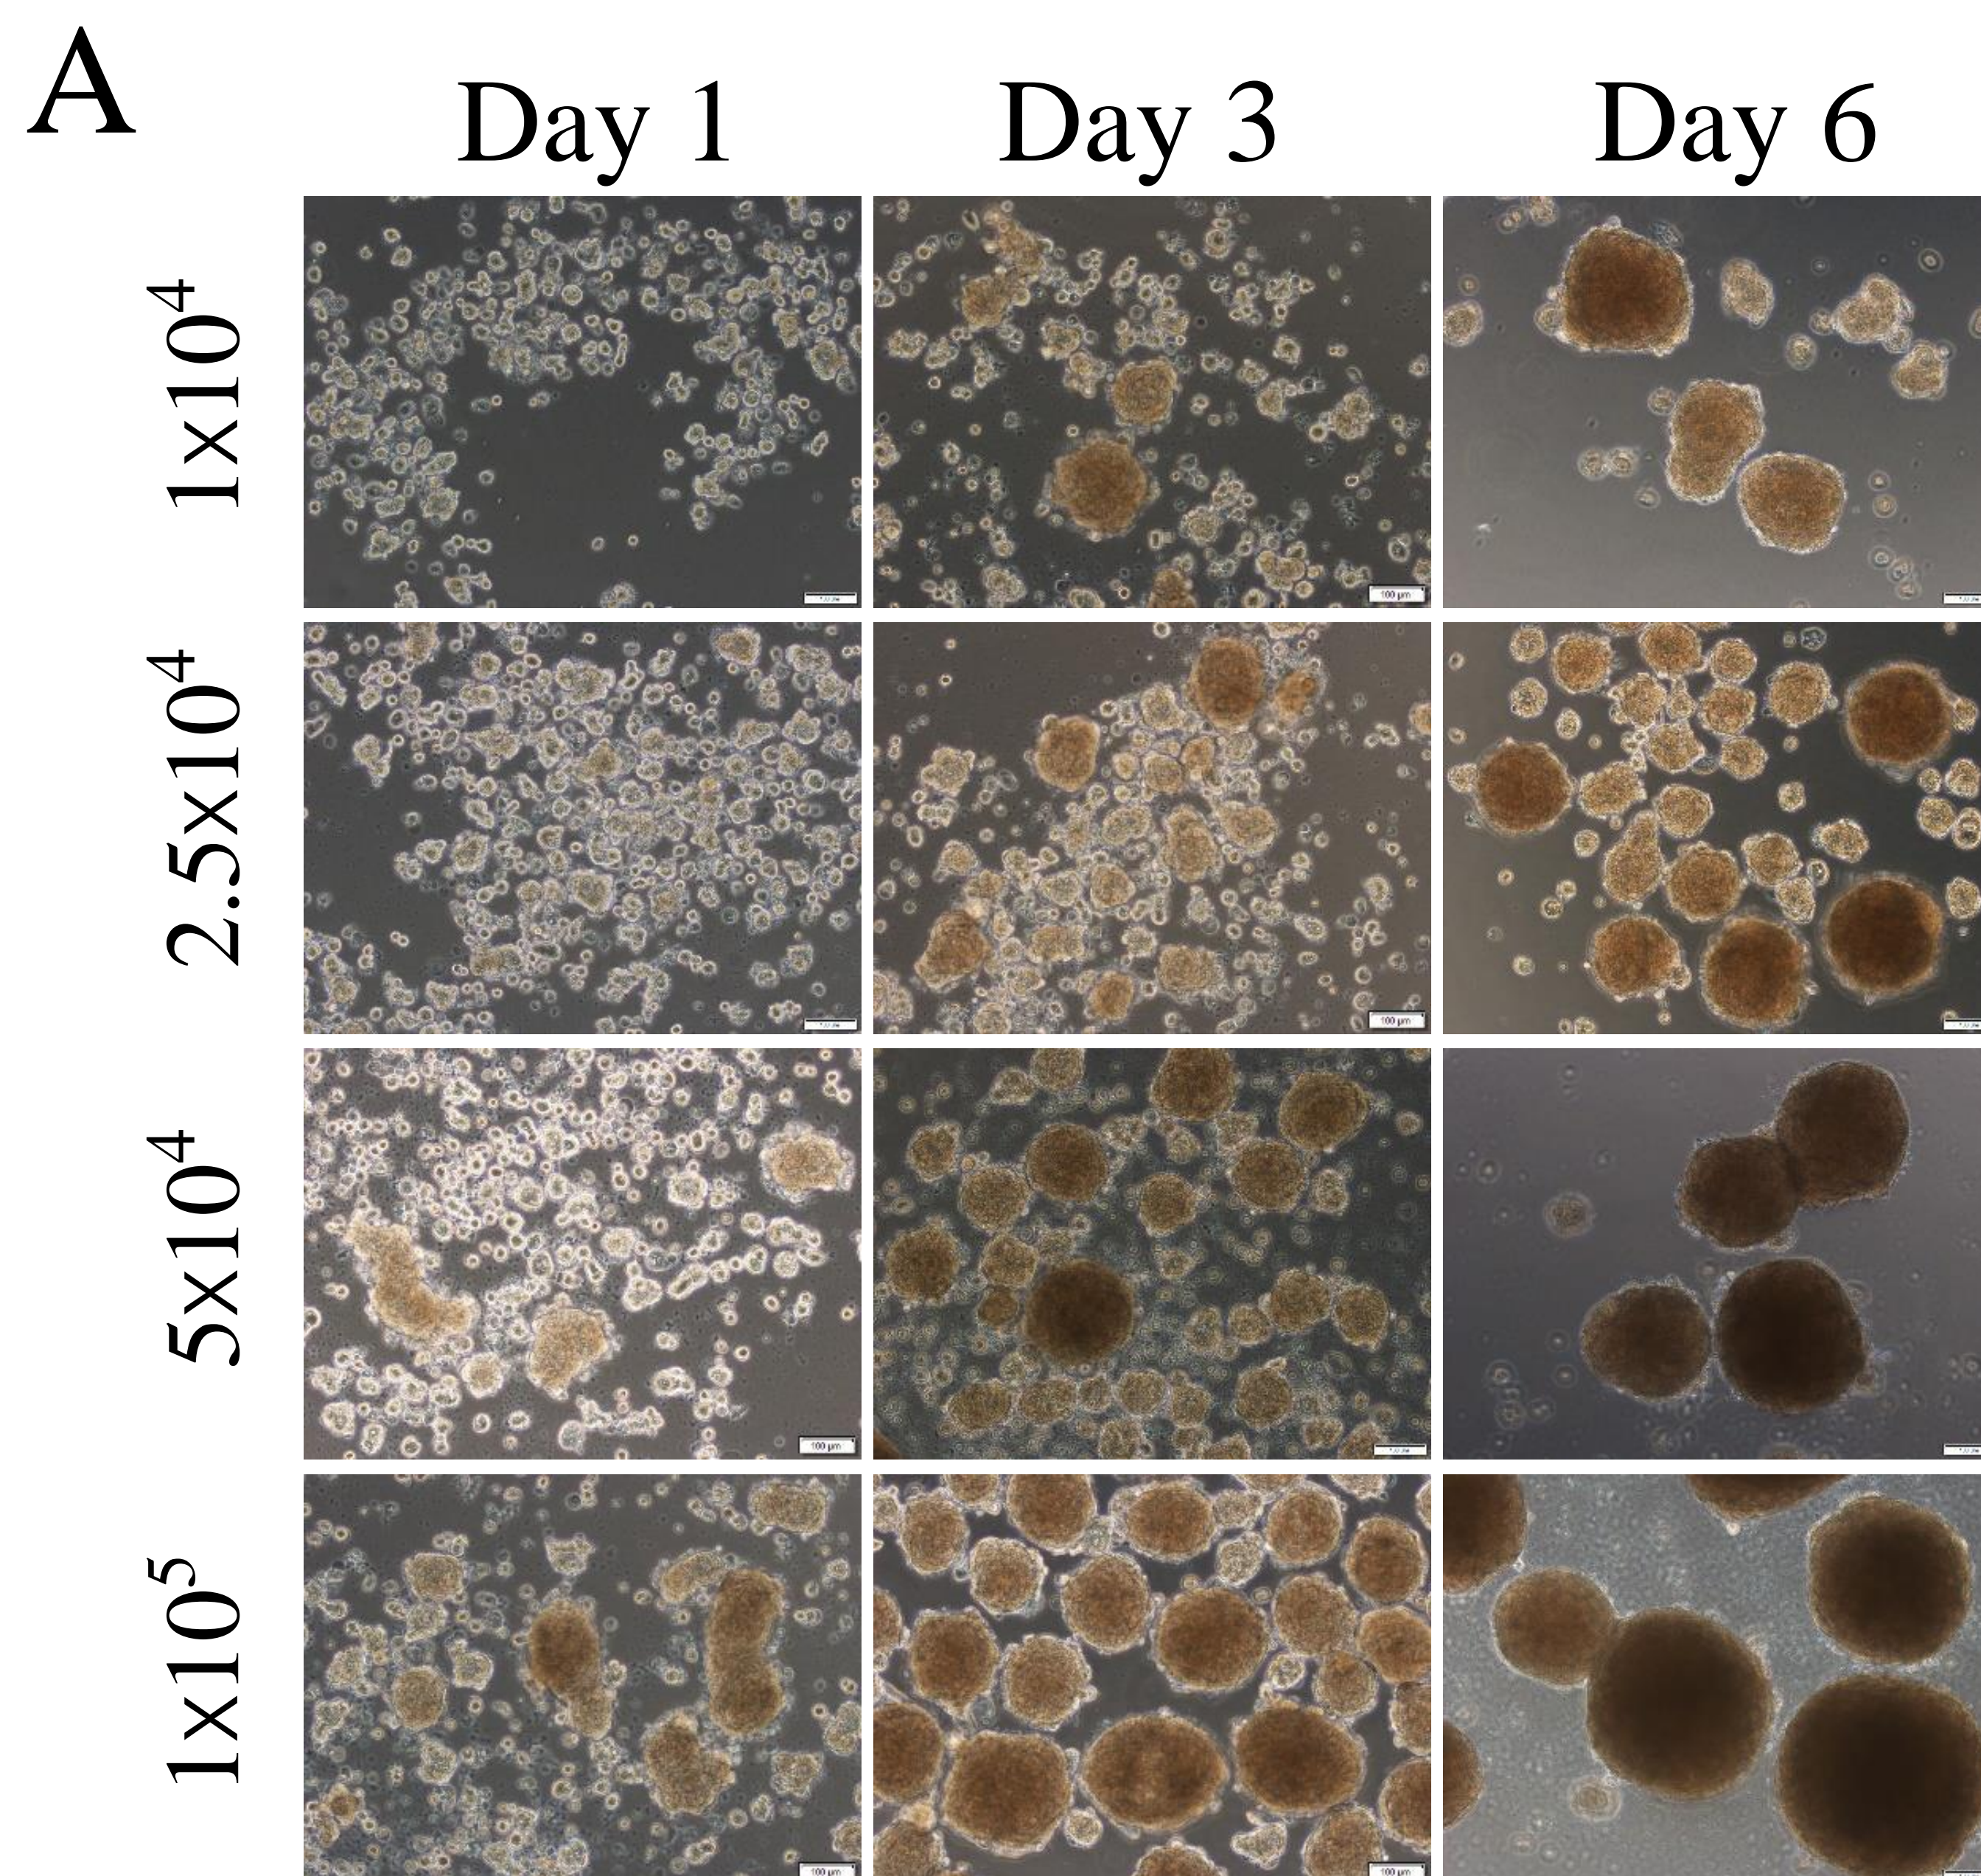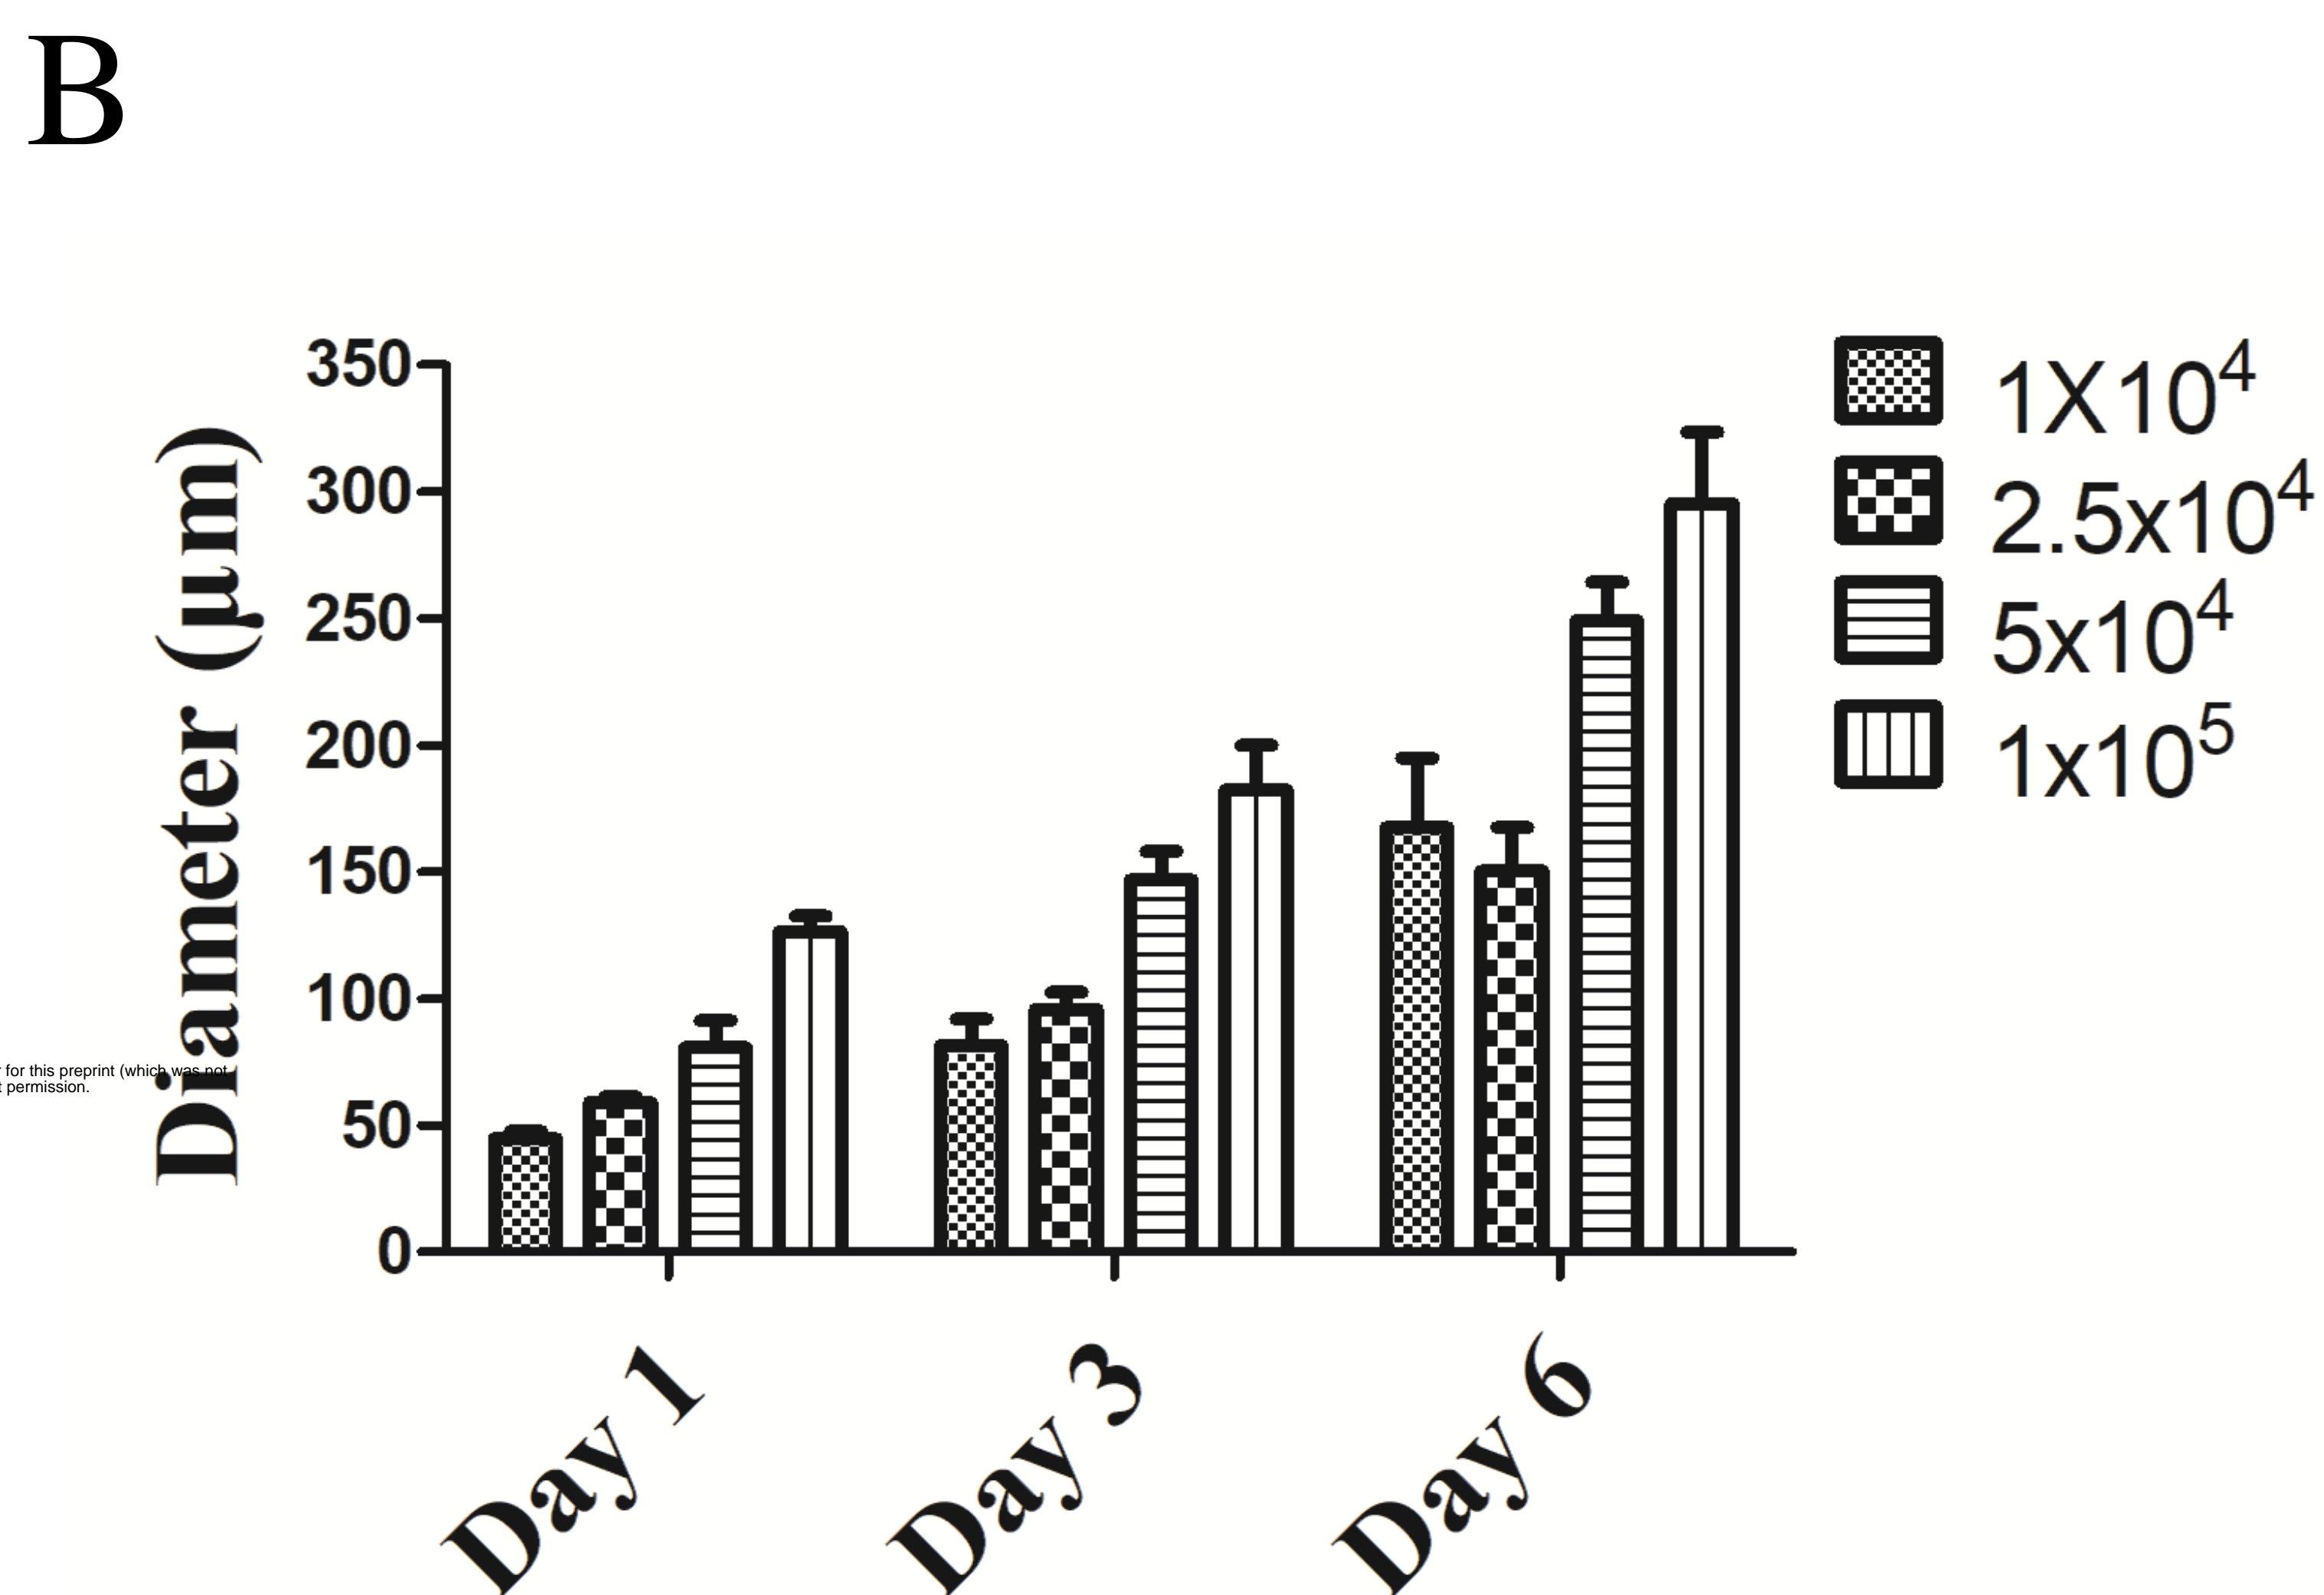

**Figure S2 MSCs can form spheroids at different cell concentrations in 20% KSR containing medium.**

(A) hMSC spheroids generated from MSCs at passage 3 in L-DMEM with 20% KSR at different cell concentration; (B) Statistic analysis of hMSC spheroids mean diameter cultured in different concentrations of KSR in L-DMEM medium. Scale bars: 100mm
